# Supplementary material for: The Relationship of DNA Methylation with Age, Gender and Genotype in Twins and Healthy Controls
Source: PLoS One. 2009 Aug 26;4(8):e6767. doi: 10.1371/journal.pone.0006767 (PMC2747671; doi:10.1371/journal.pone.0006767)
Supplement: Table S1 — Full age results (0.12 MB XLS) [file pone.0006767.s001.xls]

## Sheet: table_age_mx
	Twins				Singletons				Combined
probe	B.x	Chi2.x	p.x	p.fdr.x	B.y	Chi2.y	p.y	p.fdr.y	B	Chi2	p	p.fdr	GeneID	Symbol	CGnr	product
IL6_E168_F	0.4756	18.525	1.6769e-05	0.00385658	0.4432	37.288	1.0191e-09	9.51158e-08	0.4442	37.288	1.0191e-09	9.51158e-08	3569	IL6	cg05401786	interleukin 6 (interferon, beta 2)
PDGFRA_E125_F	0.4713	17.58	2.7547e-05	0.00385658	0.4118	30.935	2.66816e-08	1.2922e-06	0.4114	30.935	2.66816e-08	1.2922e-06	5156	PDGFRA	cg20629161	platelet-derived growth factor receptor alpha precursor
NFKB1_P496_F	-0.4224	15.125	0.000100622	0.00939138	-0.3606	30.863	2.76901e-08	1.2922e-06	-0.4072	30.863	2.76901e-08	1.2922e-06	4790	NFKB1	cg24413435	nuclear factor kappa-B, subunit 1
ACVR1_E328_R	-0.4026	11.361	0.000750024	0.0387525	-0.6482	55.757	8.20455e-14	2.29727e-11	-0.5429	55.757	8.20455e-14	2.29727e-11	90	ACVR1	cg09919801	activin A type I receptor precursor
CARD15_P302_R	-0.3899	11.309	0.000771323	0.0387525	-0.4402	33.265	8.0417e-09	5.62919e-07	-0.4222	33.265	8.0417e-09	5.62919e-07	64127	CARD15	cg23486288	NOD2 protein
ELK3_P514_F	0.3845	11.172	0.000830411	0.0387525	0.3804	28.501	9.36501e-08	3.746e-06	0.3994	28.501	9.36501e-08	3.746e-06	2004	ELK3	cg11467837	ELK3 protein
TES_P182_F	0.3361	10.41	0.00125335	0.0501339	0.3051	21.755	3.09781e-06	7.88535e-05	0.3341	21.755	3.09781e-06	7.88535e-05	26136	TES	cg00626984	testin isoform 1
CDH13_P88_F	0.3234	8.57	0.00341747	0.079741	0.4035	25.913	3.57156e-07	1.25005e-05	0.3705	25.913	3.57156e-07	1.25005e-05	1012	CDH13	cg08977371	cadherin 13 preproprotein
AOC3_P890_R	-0.309	8.964	0.00275351	0.079741	-0.2837	16.785	4.18629e-05	0.000647579	-0.2914	16.785	4.18629e-05	0.000647579	8639	AOC3	cg14591538	amine oxidase, copper containing 3 precursor
FASTK_P257_F	-0.3106	8.589	0.003382	0.079741	-0.1269	9.166	0.00246553	0.0150076	-0.2244	9.166	0.00246553	0.0150076	10922	FASTK	cg01139039	Fas-activated serine/threonine kinase isoform 4
SEPT5_P441_F	-0.3203	8.709	0.00316643	0.079741	-0.0686	7.16	0.00745472	0.0386541	-0.1942	7.16	0.00745472	0.0386541	5413	2009-09-05	cg11788728	septin 5 isoform 2
DLC1_E276_F	0.3588	9.309	0.00228031	0.079741	-0.046	3.751	0.0527759	0.158895	0.1524	3.751	0.0527759	0.158895	10395	DLC1	cg24545888	deleted in liver cancer 1 isoform 1
PITX2_E24_R	0.3188	8.081	0.00447318	0.0894635	0.5719	41.642	1.09613e-10	1.53458e-08	0.4608	41.642	1.09613e-10	1.53458e-08	5308	PITX2	cg10692923	paired-like homeodomain transcription factor 2 isoform c
CARD15_P665_F	-0.3348	8.085	0.00446331	0.0894635	-0.3128	16.339	5.29627e-05	0.000706169	-0.3072	16.339	5.29627e-05	0.000706169	64127	CARD15	cg16771652	NOD2 protein
GAS7_P622_R	0.2926	7.639	0.00571196	0.106623	0.2578	13.095	0.000296085	0.00276346	0.2616	13.095	0.000296085	0.00276346	8522	GAS7	cg10250043	growth arrest-specific 7 isoform a
EVI2A_E420_F	-0.2749	6.683	0.00973367	0.170339	-0.1937	10.486	0.00120282	0.00821441	-0.2296	10.486	0.00120282	0.00821441	2123	EVI2A	cg14414427	ecotropic viral integration site 2A isoform 1
IGF1_P933_F	-0.3206	6.56	0.0104296	0.171782	-0.4184	20.903	4.83137e-06	0.000106423	-0.3526	20.903	4.83137e-06	0.000106423	3479	IGF1	cg20581381	insulin-like growth factor 1 (somatomedin C)
MT1A_E13_R	0.2692	6.414	0.0113224	0.176126	0.3866	20.86	4.94106e-06	0.000106423	0.3275	20.86	4.94106e-06	0.000106423	4489	MT1A	cg26001009	metallothionein 1A
MET_E333_F	-0.3067	6.04	0.0139853	0.206099	0.1524	0.495	0.481705	0.674387	-0.0556	0.495	0.481705	0.674387	4233	MET	cg24548568	met proto-oncogene precursor
MFAP4_P197_F	0.2648	5.869	0.0154098	0.215737	0.2562	13.31	0.000263994	0.00254891	0.2685	13.31	0.000263994	0.00254891	4239	MFAP4	cg10351914	microfibrillar-associated protein 4
SERPINA5_P156_F	0.2642	5.399	0.0201483	0.256433	0.2663	11.629	0.000649315	0.00478442	0.2534	11.629	0.000649315	0.00478442	5104	SERPINA5	cg13984563	serine (or cysteine) proteinase inhibitor, clade A (alpha-1 antiproteinase, antitrypsin), member 5
PLAT_P80_F	-0.2784	5.418	0.0199302	0.256433	-0.0375	2.987	0.0839355	0.215244	-0.1346	2.987	0.0839355	0.215244	5327	PLAT	cg02252925	plasminogen activator, tissue type isoform 2 precursor
MFAP4_P10_R	0.2618	5.21	0.0224573	0.258109	0.293	13.739	0.000210047	0.00219223	0.2765	13.739	0.000210047	0.00219223	4239	MFAP4	cg07727884	microfibrillar-associated protein 4
LRRK1_P834_F	-0.2587	5.211	0.0224444	0.258109	-0.2103	9.64	0.00190385	0.0121154	-0.233	9.64	0.00190385	0.0121154	79705	LRRK1	cg24824910	leucine-rich repeat kinase 1
CAV1_P169_F	-0.2574	5.097	0.0239673	0.258109	-0.0524	2.355	0.124882	0.266923	-0.1168	2.355	0.124882	0.266923	857	CAV1	cg07838272	caveolin 1
RAD50_P191_F	-0.2787	5.119	0.0236653	0.258109	0.1434	0.159	0.690079	0.814927	-0.0315	0.159	0.690079	0.814927	10111	RAD50	cg05198819	RAD50 homolog isoform 2
ERN1_P809_R	-0.243	4.972	0.0257608	0.267149	-0.4596	24.433	7.69394e-07	2.39367e-05	-0.3443	24.433	7.69394e-07	2.39367e-05	2081	ERN1	cg13884260	endoplasmic reticulum to nucleus signalling 1 isoform 1
MPL_P657_F	-0.2725	4.872	0.0272958	0.272958	-0.3213	12.13	0.000496171	0.00408612	-0.2719	12.13	0.000496171	0.00408612	4352	MPL	cg06545304	myeloproliferative leukemia virus oncogene
SLC5A5_E60_F	0.2387	4.508	0.0337367	0.29832	0.3669	16.767	4.22619e-05	0.000647579	0.3024	16.767	4.22619e-05	0.000647579	6528	SLC5A5	cg04997686	solute carrier family 5 (sodium iodide symporter), member 5
EPHA5_P66_F	0.2333	4.49	0.0340937	0.29832	0.3046	11.88	0.000567399	0.00452833	0.2514	11.88	0.000567399	0.00452833	2044	EPHA5	cg02463418	ephrin receptor EphA5 isoform b
SERPINE1_P519_F	0.2391	4.58	0.0323472	0.29832	0.2014	9.014	0.00267919	0.0159612	0.2243	9.014	0.00267919	0.0159612	5054	SERPINE1	cg19722814	plasminogen activator inhibitor-1
CCND3_P435_F	-0.2506	4.592	0.0321215	0.29832	-0.1292	3.822	0.0505838	0.153951	-0.1514	3.822	0.0505838	0.153951	896	CCND3	cg22537023	cyclin D3
IL10_P85_F	0.2396	4.345	0.0371178	0.308325	0.2957	12.274	0.000459313	0.0038972	0.2629	12.274	0.000459313	0.0038972	3586	IL10	cg10978799	interleukin 10 precursor
THY1_P149_R	0.2142	4.281	0.0385407	0.308325	0.0185	4.164	0.0412918	0.131383	0.1494	4.164	0.0412918	0.131383	7070	THY1	cg18809507	Thy-1 cell surface antigen
MMP10_E136_R	-0.2508	4.303	0.0380452	0.308325	0.0794	0.356	0.550736	0.730835	-0.0463	0.356	0.550736	0.730835	4319	MMP10	cg02061229	matrix metalloproteinase 10 preproprotein
PTHR1_P258_F	-0.2235	4.07	0.0436513	0.330334	-0.4244	22.332	2.29353e-06	6.42188e-05	-0.3407	22.332	2.29353e-06	6.42188e-05	5745	PTHR1	cg13804333	parathyroid hormone receptor 1 precursor
TFAP2C_E260_F	0.2362	4.089	0.0431632	0.330334	0.3839	19.445	1.03539e-05	0.000193272	0.3307	19.445	1.03539e-05	0.000193272	7022	TFAP2C	cg13061291	transcription factor AP-2 gamma
PLSCR3_P751_R	0.2391	3.923	0.0476298	0.350957	0.1299	6.439	0.0111641	0.0520994	0.1962	6.439	0.0111641	0.0520994	57048	PLSCR3	cg26114392	phospholipid scramblase 3
CD82_P557_R	-0.2306	3.837	0.0501331	0.356475	-0.3506	16.693	4.39428e-05	0.000647579	-0.3084	16.693	4.39428e-05	0.000647579	3732	CD82	cg24700286	CD82 antigen isoform 1
PXN_P308_F	-0.2171	3.592	0.0580583	0.356475	-0.3784	15.516	8.18099e-05	0.000954448	-0.2915	15.516	8.18099e-05	0.000954448	5829	PXN	cg16785344	paxillin
B3GALT5_E246_R	-0.2051	3.585	0.0583034	0.356475	-0.3464	13.727	0.000211394	0.00219223	-0.2637	13.727	0.000211394	0.00219223	10317	B3GALT5	cg11479877	UDP-Gal:betaGlcNAc beta 1,3-galactosyltransferase 5
PEG10_P978_R	0.2244	3.758	0.0525554	0.356475	0.2967	13.356	0.000257597	0.00254891	0.2698	13.356	0.000257597	0.00254891	23089	PEG10	cg07861337	similar to paternally expressed 10
LIG3_P622_R	-0.2276	3.525	0.0604498	0.356475	-0.1895	6.652	0.00990446	0.0478146	-0.1989	6.652	0.00990446	0.0478146	3980	LIG3	cg23104440	ligase III, DNA, ATP-dependent isoform alpha precursor
SPP1_P647_F	-0.2268	3.551	0.0595096	0.356475	-0.1516	4.252	0.0392041	0.130059	-0.1603	4.252	0.0392041	0.130059	6696	SPP1	cg24861509	secreted phosphoprotein 1
FGF9_P1404_F	-0.2108	3.724	0.0536357	0.356475	-0.0101	2.193	0.138639	0.291872	-0.1102	2.193	0.138639	0.291872	2254	FGF9	cg18000242	fibroblast growth factor 9 precursor
USP29_P205_R	0.2138	3.507	0.06111	0.356475	-0.055	0.537	0.463679	0.666992	0.0555	0.537	0.463679	0.666992	57663	USP29	cg25357752	ubiquitin specific protease 29
CYP1B1_P212_F	-0.2094	3.639	0.0564408	0.356475	0.0713	0.512	0.474274	0.667928	-0.0534	0.512	0.474274	0.667928	1545	CYP1B1	cg07057636	cytochrome P450, family 1, subfamily B, polypeptide 1
HGF_E102_R	-0.2281	3.534	0.0601226	0.356475	0.1785	0	1	1	0.00022216	0	1	1	3082	HGF	cg08988647	hepatocyte growth factor isoform 4 precursor
SPI1_E205_F	0.2019	3.449	0.0632901	0.359611	-0.0355	0.844	0.358255	0.557286	0.068	0.844	0.358255	0.557286	6688	SPI1	cg07675031	spleen focus forming virus (SFFV) proviral integration oncogene spi1
TP73_E155_F	-0.1986	3.425	0.0642162	0.359611	0.0768	0.518	0.471696	0.667928	-0.053	0.518	0.471696	0.667928	7161	TP73	cg05300134	tumor protein p73
RARA_P176_R	0.2146	3.315	0.0686503	0.369656	0.406	15.381	8.78674e-05	0.000984115	0.2968	15.381	8.78674e-05	0.000984115	5914	RARA	cg10363722	retinoic acid receptor, alpha isoform a
EPHX1_P1358_R	-0.2148	3.342	0.0675325	0.369656	-0.2206	6.961	0.00833055	0.040922	-0.2001	6.961	0.00833055	0.040922	2052	EPHX1	cg12786690	epoxide hydrolase 1, microsomal (xenobiotic)
SOX17_P287_R	0.20184	3.28	0.0701289	0.370492	0.4607	20.411	6.24697e-06	0.000124939	0.333	20.411	6.24697e-06	0.000124939	64321	SOX17	cg19346665	SRY-box 17
ZAP70_P220_R	-0.2003	3.239	0.0719045	0.372838	-0.1189	4.727	0.0296926	0.108666	-0.162	4.727	0.0296926	0.108666	7535	ZAP70	cg09006159	zeta-chain associated protein kinase 70kDa isoform 1
LTB4R_P163_F	-0.2067	3.138	0.0764875	0.389391	-0.1971	6.102	0.0135029	0.0600129	-0.1881	6.102	0.0135029	0.0600129	1241	LTB4R	cg14137885	leukotriene B4 receptor
LMO2_E148_F	0.1978	3.063	0.0800937	0.400468	0.1658	5.6	0.0179605	0.0750587	0.1777	5.6	0.0179605	0.0750587	4005	LMO2	cg22902574	LIM domain only 2
NEU1_P745_F	-0.1913	3.012	0.0826503	0.406001	0.1386	0.004	0.949571	0.977261	0.005	0.004	0.949571	0.977261	4758	NEU1	cg20383155	neuraminidase precursor
MST1R_P87_R	-0.2014	2.961	0.0852952	0.41177	0.2509	0.565	0.452253	0.65903	0.0584	0.565	0.452253	0.65903	4486	MST1R	cg01709977	macrophage stimulating 1 receptor
SNURF_P2_R	-0.19	2.817	0.0932706	0.44264	-0.0978	3.332	0.0679442	0.190244	-0.136	3.332	0.0679442	0.190244	8926	SNURF	cg17916021	SNRPN upstream reading frame protein
JAK3_P1075_R	-0.2117	2.773	0.0958663	0.447376	-0.309	11.832	0.000582214	0.00452833	-0.2698	11.832	0.000582214	0.00452833	3718	JAK3	cg05244380	Janus kinase 3
MPO_E302_R	-0.1891	2.708	0.0998461	0.450918	-0.3791	15.943	6.52787e-05	0.00083082	-0.2987	15.943	6.52787e-05	0.00083082	4353	MPO	cg09421562	myeloperoxidase
ALPL_P433_F	0.1761	2.709	0.0997835	0.450918	0.0436	1.989	0.158445	0.328628	0.1032	1.989	0.158445	0.328628	249	ALPL	cg23352747	tissue non-specific alkaline phosphatase precursor
NGFR_E328_F	0.174	2.652	0.10342	0.459643	0.1873	5.505	0.0189622	0.0779669	0.1707	5.505	0.0189622	0.0779669	4804	NGFR	cg07426306	nerve growth factor receptor precursor
MATK_P190_R	0.1834	2.626	0.105126	0.459927	0.2962	10.604	0.00112843	0.00789903	0.2423	10.604	0.00112843	0.00789903	4145	MATK	cg21380287	megakaryocyte-associated tyrosine kinase isoform a
CLK1_P538_F	-0.1899	2.552	0.110155	0.474513	-0.2001	8.275	0.00401947	0.0229684	-0.2238	8.275	0.00401947	0.0229684	1195	CLK1	cg08898736	CDC-like kinase 1 isoform 1
PTPRH_E173_F	0.1797	2.523	0.112197	0.475987	0.095	2.55	0.110294	0.251872	0.1201	2.55	0.110294	0.251872	5794	PTPRH	cg09948821	protein tyrosine phosphatase, receptor type, H precursor
WNT1_P79_R	0.1645	2.41	0.120562	0.491432	0.4148	17.077	3.58944e-05	0.000628152	0.2897	17.077	3.58944e-05	0.000628152	7471	WNT1	cg08133093	wingless-type MMTV integration site family, member 1 precursor
CSPG2_P82_R	-0.1679	2.403	0.121103	0.491432	0.0346	0.292	0.588942	0.752985	-0.0404	0.292	0.588942	0.752985	1462	CSPG2	cg02861411	chondroitin sulfate proteoglycan 2 (versican)
CD34_P339_R	0.1655	2.419	0.119871	0.491432	-0.0955	0.211	0.645985	0.78985	0.0339	0.211	0.645985	0.78985	947	CD34	cg03583857	CD34 antigen isoform a
PCGF4_P760_R	-0.1639	2.34	0.12609	0.504358	-0.0505	1.034	0.309221	0.527927	-0.0755	1.034	0.309221	0.527927	648	PCGF4	cg26800126	polycomb group ring finger 4
MBD2_P233_F	-0.1709	2.232	0.135179	0.514143	-0.1643	6.034	0.0140329	0.0613939	-0.1859	6.034	0.0140329	0.0613939	8932	MBD2	cg15090185	methyl-CpG binding domain protein 2 isoform 1
PCTK1_E77_R	-0.1623	2.228	0.135529	0.514143	-0.2113	1.991	0.158236	0.328628	-0.101	1.991	0.158236	0.328628	5127	PCTK1	cg12064400	PCTAIRE protein kinase 1
TAL1_P817_F	-0.1671	2.224	0.135881	0.514143	0.1974	0.028	0.867109	0.926681	0.0128	0.028	0.867109	0.926681	6886	TAL1	cg26891410	T-cell acute lymphocytic leukemia 1
SERPINA5_E69_F	0.1767	2.271	0.131815	0.514143	-0.1612	0.017	0.896263	0.946994	-0.01	0.017	0.896263	0.946994	5104	SERPINA5	cg08764227	serine (or cysteine) proteinase inhibitor, clade A (alpha-1 antiproteinase, antitrypsin), member 5
ARHGDIB_P148_R	0.1834	2.186	0.139271	0.519944	0.0953	2.423	0.119566	0.26155	0.1222	2.423	0.119566	0.26155	397	ARHGDIB	cg15450139	Rho GDP dissociation inhibitor (GDI) beta
RYK_P493_F	-0.1676	2.157	0.141922	0.522869	-0.2571	7.082	0.00778621	0.0396389	-0.1995	7.082	0.00778621	0.0396389	6259	RYK	cg04318393	similar to RYK receptor-like tyrosine kinase isoform 2
GRB7_E71_R	0.1741	2.116	0.145767	0.523265	0.1671	4.305	0.0380005	0.129758	0.1602	4.305	0.0380005	0.129758	2886	GRB7	cg23836594	growth factor receptor-bound protein 7
AREG_P217_R	-0.1481	2.125	0.144913	0.523265	-0.0513	3.164	0.0752785	0.201112	-0.1309	3.164	0.0752785	0.201112	374	AREG	cg23375843	amphiregulin preproprotein
CSF3R_P8_F	0.1663	2.083	0.148947	0.527914	0.3473	12.704	0.000364874	0.00319265	0.2676	12.704	0.000364874	0.00319265	1441	CSF3R	cg00474419	colony stimulating factor 3 receptor isoform d precursor
BMP4_P123_R	-0.1573	2.023	0.154933	0.542265	0.0812	0.241	0.623485	0.778592	-0.0367	0.241	0.623485	0.778592	652	BMP4	cg26240298	bone morphogenetic protein 4 preproprotein
TJP2_P518_F	-0.1706	1.954	0.162156	0.55397	-0.2099	5.898	0.0151581	0.0652964	-0.1886	5.898	0.0151581	0.0652964	9414	TJP2	cg16782205	tight junction protein 2 (zona occludens 2) isoform 1
SEMA3C_P642_F	-0.1547	1.941	0.16356	0.55397	0.1279	0.082	0.774605	0.860672	0.0217	0.082	0.774605	0.860672	10512	SEMA3C	cg03445665	semaphorin 3C
UBA52_P293_R	-0.1497	1.935	0.164212	0.55397	0.15	0.049	0.824813	0.902139	0.0164	0.049	0.824813	0.902139	7311	UBA52	cg23146959	ubiquitin and ribosomal protein L40 precursor
CASP10_E139_F	0.1427	1.821	0.177194	0.590648	0.2486	10.283	0.00134261	0.00895076	0.236	10.283	0.00134261	0.00895076	843	CASP10	cg20209903	caspase 10 isoform a preproprotein
LIF_P383_R	-0.1414	1.762	0.184375	0.607354	-0.0113	1.013	0.314185	0.529591	-0.0734	1.013	0.314185	0.529591	3976	LIF	cg26721064	leukemia inhibitory factor (cholinergic differentiation factor)
PDGFB_P719_F	-0.1504	1.737	0.187519	0.610528	0.1579	0.003	0.95632	0.977261	0.0042	0.003	0.95632	0.977261	5155	PDGFB	cg10554007	platelet-derived growth factor beta isoform 1, preproprotein
FGF2_P229_F	0.1379	1.622	0.202813	0.638502	0.4351	16.523	4.80635e-05	0.000672889	0.2984	16.523	4.80635e-05	0.000672889	2247	FGF2	cg03941587	fibroblast growth factor 2
IGFBP1_E48_R	0.1432	1.621	0.202952	0.638502	0.3715	11.77	0.00060193	0.00455514	0.25545	11.77	0.00060193	0.00455514	3484	IGFBP1	cg20666158	insulin-like growth factor binding protein 1 isoform b precursor
DUSP4_P925_R	-0.151	1.622	0.202813	0.638502	0.1866	0.948	0.330229	0.542819	0.0761	0.948	0.330229	0.542819	1846	DUSP4	cg24336078	dual specificity phosphatase 4 isoform 1
SEPT9_P374_F	-0.1534	1.592	0.207041	0.644126	-0.0933	2.811	0.09362	0.229944	-0.1304	2.811	0.09362	0.229944	10801	2009-09-09	cg11617283	septin 9
WNT10B_P823_R	0.1261	1.413	0.234559	0.663399	0.381	12.81	0.000344772	0.00311407	0.2533	12.81	0.000344772	0.00311407	7480	WNT10B	cg23890019	wingless-type MMTV integration site family, member 10B precursor
DLL1_P832_F	0.1272	1.426	0.232418	0.663399	0.1866	6.503	0.0107693	0.0511084	0.1864	6.503	0.0107693	0.0511084	28514	DLL1	cg10810632	delta-like 1
LMO2_P794_R	0.149	1.486	0.222838	0.663399	0.2086	5.321	0.0210699	0.0830926	0.1792	5.321	0.0210699	0.0830926	4005	LMO2	cg02028355	LIM domain only 2
GABRB3_P92_F	0.1309	1.42	0.233403	0.663399	0.176	5.111	0.0237746	0.0911903	0.1686	5.111	0.0237746	0.0911903	2562	GABRB3	cg16084228	gamma-aminobutyric acid (GABA) A receptor, beta 3 isoform 2 precursor
MMP14_P13_F	0.1446	1.457	0.227408	0.663399	0.2032	4.716	0.0298832	0.108666	0.1675	4.716	0.0298832	0.108666	4323	MMP14	cg09208010	matrix metalloproteinase 14 preproprotein
EPHA8_P256_F	0.1381	1.502	0.220364	0.663399	0.0477	1.727	0.188794	0.381856	0.098832	1.727	0.188794	0.381856	2046	EPHA8	cg06991945	EPH receptor A8 isoform 1 precursor
IGFBP6_P328_R	0.139	1.482	0.223462	0.663399	0.056	1.603	0.205479	0.400906	0.0965	1.603	0.205479	0.400906	3489	IGFBP6	cg00122038	insulin-like growth factor binding protein 6
SRC_E100_R	0.1249	1.427	0.232255	0.663399	-0.148	0.141	0.707289	0.814983	-0.0272	0.141	0.707289	0.814983	6714	SRC	cg05935845	proto-oncogene tyrosine-protein kinase SRC
MTA1_P478_F	0.1293	1.441	0.229978	0.663399	-0.1206	0.002	0.964329	0.981863	0.0033	0.002	0.964329	0.981863	9112	MTA1	cg21902921	metastasis associated protein
TFDP1_P543_R	-0.1337	1.394	0.237731	0.665646	-0.179	4.096	0.0429848	0.135233	-0.1505	4.096	0.0429848	0.135233	7027	TFDP1	cg03399232	transcription factor Dp-1
TIAM1_P188_R	0.1511	1.342	0.246682	0.68387	0.0039	0.535	0.464512	0.666992	0.0589	0.535	0.464512	0.666992	7074	TIAM1	cg02217293	T-cell lymphoma invasion and metastasis 1
ICAM1_E242_F	-0.1221	1.324	0.249875	0.685933	0.0527	0.148	0.700454	0.814927	-0.0279	0.148	0.700454	0.814927	3383	ICAM1	cg20539223	intercellular adhesion molecule 1 precursor
HLA-DRA_P132_R	-0.1256	1.308	0.252757	0.687107	-0.0363	1.721	0.189564	0.381856	-0.0973	1.721	0.189564	0.381856	3122	HLA-DRA	cg18576604	major histocompatibility complex, class II, DR alpha precursor
HS3ST2_P546_F	0.1206	1.259	0.26184	0.704955	0.1075	3.583	0.0583736	0.172775	0.1388	3.583	0.0583736	0.172775	9956	HS3ST2	cg23911889	heparan sulfate D-glucosaminyl 3-O-sulfotransferase 2
ID1_P880_F	-0.1293	1.225	0.268382	0.715684	-0.0461	1.118	0.29035	0.49876	-0.081	1.118	0.29035	0.49876	3397	ID1	cg22503909	inhibitor of DNA binding 1 isoform a
CCR5_P630_R	-0.1252	1.197	0.273922	0.723568	-0.1683	4.183	0.0408314	0.131383	-0.1548	4.183	0.0408314	0.131383	1234	CCR5	cg21689024	chemokine (C-C motif) receptor 5
GPATC3_P410_R	-0.1298	1.137	0.286287	0.740171	0.2613	1.4	0.236724	0.441884	0.0925	1.4	0.236724	0.441884	63906	GPATC3	cg18665535	G patch domain containing 3
EXT1_E197_F	-0.1186	1.137	0.286287	0.740171	0.0755	0.169	0.681002	0.814927	-0.0308	0.169	0.681002	0.814927	2131	EXT1	cg27085164	exostosin 1
GRB10_P496_R	0.1346	1.116	0.290781	0.740171	-0.0373	0.156	0.692866	0.814927	0.0314	0.156	0.692866	0.814927	2887	GRB10	cg19392396	growth factor receptor-bound protein 10 isoform c
PEG3_E496_F	0.1175	1.119	0.290134	0.740171	-0.0699	0.003	0.95632	0.977261	-0.0038	0.003	0.95632	0.977261	5178	PEG3	cg07299214	paternally expressed 3
CPA4_E20_F	-0.1093	1.051	0.305277	0.752635	-0.4312	15.681	7.49735e-05	0.000912721	-0.2857	15.681	7.49735e-05	0.000912721	51200	CPA4	cg01796223	carboxypeptidase A4 preproprotein
MAP2K6_P297_R	0.1139	1.046	0.30643	0.752635	0.1422	4.26	0.0390199	0.130059	0.1486	4.26	0.0390199	0.130059	5608	MAP2K6	cg23296889	mitogen-activated protein kinase kinase 6 isoform 1
KLF5_P13_F	-0.1144	1.081	0.298474	0.752635	0.1583	0.41	0.52197	0.712934	0.0481	0.41	0.52197	0.712934	688	KLF5	cg16541703	Kruppel-like factor 5
HOXA5_P1324_F	-0.1268	1.05	0.305507	0.752635	0.1569	0.22	0.63904	0.784786	0.0365	0.22	0.63904	0.784786	3202	HOXA5	cg05640017	homeobox A5
HPN_P374_R	0.1092	0.946	0.33074	0.77292	0.3215	8.366	0.00382306	0.0223012	0.213	8.366	0.00382306	0.0223012	3249	HPN	cg03537100	hepsin (transmembrane protease, serine 1)
HOXA9_P303_F	0.1055	0.972	0.324182	0.77292	0.2536	7.471	0.00627007	0.0351124	0.2003	7.471	0.00627007	0.0351124	3205	HOXA9	cg03715906	homeobox protein A9 isoform b
SPI1_P48_F	0.1149	0.982	0.321706	0.77292	0.2087	4.33	0.0374462	0.129444	0.1579	4.33	0.0374462	0.129444	6688	SPI1	cg03565868	spleen focus forming virus (SFFV) proviral integration oncogene spi1
DIO3_P90_F	0.1057	0.947	0.330484	0.77292	0.0721	0.903	0.341979	0.545761	0.0705	0.903	0.341979	0.545761	1735	DIO3	cg25468490	deiodinase, iodothyronine, type III
HOXB13_E21_F	0.1148	0.956	0.328197	0.77292	0.0173	0.617	0.432164	0.641851	0.0603	0.617	0.432164	0.641851	10481	HOXB13	cg21160992	homeo box B13
NPR2_P618_F	-0.1223	0.944	0.331251	0.77292	-0.0442	0.608	0.435542	0.641851	-0.062	0.608	0.435542	0.641851	4882	NPR2	cg02519855	natriuretic peptide receptor B precursor
NOS2A_P288_R	-0.111	0.846	0.357686	0.794859	-0.3869	10.896	0.000963721	0.00691903	-0.2524	10.896	0.000963721	0.00691903	4843	NOS2A	cg00297776	nitric oxide synthase 2A isoform 1
COL18A1_P365_R	0.1184	0.864	0.352622	0.794859	0.2922	7.274	0.00699598	0.0376707	0.2123	7.274	0.00699598	0.0376707	80781	COL18A1	cg26239725	alpha 1 type XVIII collagen isoform 3 precursor
S100A4_P194_R	-0.1056	0.853	0.355705	0.794859	-0.1753	3.234	0.0721243	0.196066	-0.1351	3.234	0.0721243	0.196066	6275	S100A4	cg13091627	S100 calcium-binding protein A4
HDAC1_P414_R	-0.1126	0.891	0.345206	0.794859	-0.0374	0.656	0.417976	0.629211	-0.0618	0.656	0.417976	0.629211	3065	HDAC1	cg24468890	histone deacetylase 1
GJB2_P791_R	0.0996	0.848	0.357119	0.794859	0.0168	0.468	0.493909	0.684626	0.0504	0.468	0.493909	0.684626	2706	GJB2	cg20193013	gap junction protein, beta 2, 26kDa (connexin 26)
DDIT3_P1313_R	-0.1185	0.863	0.352901	0.794859	0.1456	0.094	0.759152	0.850251	0.0243	0.094	0.759152	0.850251	1649	DDIT3	cg19520710	DNA-damage-inducible transcript 3
IFNGR2_P377_R	0.1044	0.822	0.364596	0.799472	0.2475	6.211	0.0126959	0.0573363	0.1874	6.211	0.0126959	0.0573363	3460	IFNGR2	cg21449657	interferon-gamma receptor beta chain precursor
THPO_E483_F	0.112	0.819	0.365473	0.799472	0.1589	2.847	0.0915446	0.226836	0.1323	2.847	0.0915446	0.226836	7066	THPO	cg08997821	thrombopoietin isoform 2 precursor
ZNF264_P397_F	0.1046	0.796	0.372292	0.80186	0.1463	2.624	0.105259	0.243574	0.1231	2.624	0.105259	0.243574	9422	ZNF264	cg04803824	zinc finger protein 264
TEK_E75_F	-0.1089	0.801	0.370795	0.80186	-0.0098	0.899	0.34305	0.545761	-0.0742	0.899	0.34305	0.545761	7010	TEK	cg05749772	TEK tyrosine kinase, endothelial
GFI1_P208_R	0.1091	0.783	0.376225	0.804145	0.174	3.334	0.0678616	0.190244	0.1428	3.334	0.0678616	0.190244	2672	GFI1	cg20125091	growth factor independent 1
SIN3B_P607_F	-0.1023	0.76	0.383329	0.813121	-0.0344	1.588	0.207612	0.400906	-0.0986	1.588	0.207612	0.400906	23309	SIN3B	cg22629500	SIN3 homolog B, transcription regulator
KRT13_P676_F	-0.1057	0.747	0.387428	0.815637	0.0043	0.157	0.691934	0.814927	-0.0309	0.157	0.691934	0.814927	3860	KRT13	cg24851986	keratin 13 isoform b
XPC_P226_R	-0.0893	0.707	0.400442	0.836101	-0.1038	2.531	0.111629	0.252067	-0.1161	2.531	0.111629	0.252067	7508	XPC	cg23512686	xeroderma pigmentosum, complementation group C
OSM_P188_F	-0.0965	0.699	0.40312	0.836101	0.1793	0.522	0.46999	0.667928	0.0549	0.522	0.46999	0.667928	5008	OSM	cg04546763	oncostatin M precursor
EMR3_E61_F	0.0992	0.68	0.409587	0.843267	0.1993	3.576	0.0586201	0.172775	0.1461	3.576	0.0586201	0.172775	84658	EMR3	cg15552238	egf-like module-containing mucin-like receptor 3 isoform b
IL16_P226_F	-0.1014	0.649	0.42047	0.849378	-0.1616	3.26	0.0709891	0.196066	-0.1424	3.26	0.0709891	0.196066	3603	IL16	cg12993983	interleukin 16 isoform 1 precursor
NDN_E131_R	0.0766	0.654	0.418686	0.849378	0.145	1.434	0.231113	0.440215	0.0817	1.434	0.231113	0.440215	4692	NDN	cg10021600	necdin
CRK_P721_F	0.0989	0.637	0.424799	0.849378	0.1339	1.35	0.245278	0.45482	0.0919	1.35	0.245278	0.45482	1398	CRK	cg16557332	v-crk sarcoma virus CT10 oncogene homolog isoform b
GNAS_P86_F	-0.0902	0.631	0.426989	0.849378	-0.0837	0.844	0.358255	0.557286	-0.068	0.844	0.358255	0.557286	2778	GNAS	cg14432005	guanine nucleotide binding protein, alpha stimulating activity polypeptide 1 isoform d
PRSS1_P1249_R	0.0824	0.629	0.427722	0.849378	-0.124	0.079	0.778657	0.861755	-0.0198	0.079	0.778657	0.861755	5644	PRSS1	cg09471643	protease, serine, 1 preproprotein
GPX1_P194_F	-0.0965	0.619	0.431419	0.850686	-0.1637	1.595	0.206613	0.400906	-0.098	1.595	0.206613	0.400906	2876	GPX1	cg08539067	glutathione peroxidase 1 isoform 1
CD81_P272_R	0.0845	0.487	0.485269	0.854179	0.3263	9.64	0.00190385	0.0121154	0.24	9.64	0.00190385	0.0121154	975	CD81	cg26129028	CD81 antigen
OPCML_E219_R	0.0803	0.489	0.484374	0.854179	0.3538	9.406	0.00216277	0.0134572	0.2305	9.406	0.00216277	0.0134572	4978	OPCML	cg19151121	opioid binding protein/cell adhesion molecule-like isoform a preproprotein
IGFBP1_P12_R	0.0812	0.482	0.487518	0.854179	0.3075	7.196	0.00730663	0.038601	0.2047	7.196	0.00730663	0.038601	3484	IGFBP1	cg00110785	insulin-like growth factor binding protein 1 isoform b precursor
PPAT_E170_R	0.0904	0.547	0.459546	0.854179	0.1988	4.005	0.0453655	0.139586	0.1556	4.005	0.0453655	0.139586	5471	PPAT	cg08412991	phosphoribosyl pyrophosphate amidotransferase proprotein
SYBL1_P349_F	-0.0743	0.484	0.486616	0.854179	-0.1608	3.107	0.0779564	0.203998	-0.126	3.107	0.0779564	0.203998	6845	SYBL1	cg11419984	synaptobrevin-like 1
ZNF215_P71_R	0.0807	0.536	0.464095	0.854179	0.1911	2.869	0.090301	0.225752	0.1257	2.869	0.090301	0.225752	7762	ZNF215	cg17958423	zinc finger protein 215
TMEFF1_P626_R	-0.09	0.579	0.446705	0.854179	0.3298	2.783	0.0952696	0.231961	0.1292	2.783	0.0952696	0.231961	8577	TMEFF1	cg20925051	transmembrane protein with EGF-like and two follistatin-like domains 1
ZIM2_E110_F	0.0831	0.537	0.463679	0.854179	0.1337	2.4	0.121335	0.263363	0.1145	2.4	0.121335	0.263363	23619	ZIM2	cg07746548	zinc finger, imprinted 2
MUC1_E18_R	0.0794	0.474	0.491153	0.854179	0.1283	1.692	0.193338	0.386675	0.0984	1.692	0.193338	0.386675	4582	MUC1	cg00265953	MUC1 mucin isoform 1 precursor
STAT5A_P704_R	-0.082	0.475	0.490696	0.854179	-0.0665	1.176	0.278172	0.489862	-0.0826	1.176	0.278172	0.489862	6776	STAT5A	cg09355539	signal transducer and activator of transcription 5A
CDKN2B_E220_F	-0.0791	0.554	0.456688	0.854179	-0.1523	1.026	0.3111	0.527927	-0.0746	1.026	0.3111	0.527927	1030	CDKN2B	cg18731427	cyclin-dependent kinase inhibitor 2B isoform 1
PHLDA2_P622_F	0.0892	0.548	0.459136	0.854179	0.0395	0.56	0.45426	0.65903	0.0572	0.56	0.45426	0.65903	7262	PHLDA2	cg07667013	pleckstrin homology-like domain family A member 2
AATK_P519_R	0.0739	0.496	0.481263	0.854179	0.0156	0.362	0.547398	0.729863	0.0429	0.362	0.547398	0.729863	9625	AATK	cg17279079	apoptosis-associated tyrosine kinase
HCK_P46_R	0.0834	0.601	0.438197	0.854179	-0.0269	0.332	0.564484	0.735142	0.0427	0.332	0.564484	0.735142	3055	HCK	cg15382497	hemopoietic cell kinase isoform p61HCK
CDK2_P330_R	-0.0815	0.573	0.449069	0.854179	-0.0456	0.305	0.580765	0.749374	-0.0407	0.305	0.580765	0.749374	1017	CDK2	cg01221216	cyclin-dependent kinase 2 isoform 2
TDGF1_P428_R	-0.0772	0.474	0.491153	0.854179	0.0045	0.056	0.812934	0.892633	-0.0163	0.056	0.812934	0.892633	6997	TDGF1	cg04728702	teratocarcinoma-derived growth factor 1
PPARG_P693_F	-0.0814	0.525	0.468717	0.854179	0.0929	0.038	0.845443	0.918395	0.0144	0.038	0.845443	0.918395	5468	PPARG	cg27051533	peroxisome proliferative activated receptor gamma isoform 1
DAPK1_E46_R	-0.0849	0.558	0.455067	0.854179	0.0081	0.029	0.864779	0.926681	-0.0127	0.029	0.864779	0.926681	1612	DAPK1	cg22630196	death-associated protein kinase 1
GLI3_P453_R	0.079	0.534	0.46493	0.854179	-0.0185	0.024	0.876885	0.930029	0.0114	0.024	0.876885	0.930029	2737	GLI3	cg23194824	GLI-Kruppel family member GLI3
FGFR2_P460_R	0.0736	0.463	0.496225	0.857673	0.2725	6.408	0.0113607	0.0521476	0.184	6.408	0.0113607	0.0521476	2263	FGFR2	cg04640037	fibroblast growth factor receptor 2 isoform 12 precursor
E2F5_P516_R	-0.0718	0.4	0.527089	0.899908	0.201	1.158	0.281881	0.493291	0.0793	1.158	0.281881	0.493291	1875	E2F5	cg04207142	E2F transcription factor 5
CHGA_P243_F	0.0914	0.401	0.526573	0.899908	-0.1259	0.281	0.596047	0.758605	-0.0438	0.281	0.596047	0.758605	1113	CHGA	cg02706439	chromogranin A precursor
PDE1B_E141_F	-0.0704	0.372	0.541916	0.919615	0.0133	0.349	0.55468	0.7314	-0.0456	0.349	0.55468	0.7314	5153	PDE1B	cg15927682	phosphodiesterase 1B, calmodulin-dependent
OGG1_E400_F	-0.0718	0.353	0.55242	0.931792	0.1495	0.384	0.53547	0.721671	0.0482	0.384	0.53547	0.721671	4968	OGG1	cg10816847	8-oxoguanine DNA glycosylase isoform 2d
WNT5A_P655_F	0.0693	0.336	0.562147	0.938855	0.179	3.24	0.0718606	0.196066	0.1391	3.24	0.0718606	0.196066	7474	WNT5A	cg19344602	wingless-type MMTV integration site family, member 5A precursor
PECAM1_P135_F	0.0624	0.334	0.563313	0.938855	0.081	0.915	0.338791	0.545761	0.0704	0.915	0.338791	0.545761	5175	PECAM1	cg05359956	platelet/endothelial cell adhesion molecule (CD31 antigen)
RARA_P1076_R	0.0626	0.323	0.56981	0.944064	0.211	4.207	0.0402575	0.131071	0.1528	4.207	0.0402575	0.131071	5914	RARA	cg23685453	retinoic acid receptor, alpha isoform a
CREBBP_P712_R	-0.0721	0.304	0.581386	0.947046	0.3283	4.449	0.0349217	0.122226	0.1684	4.449	0.0349217	0.122226	1387	CREBBP	cg18797283	CREB binding protein
C20orf47_P225_R	-0.059	0.298	0.585139	0.947046	-0.1994	3.549	0.0595813	0.173779	-0.1373	3.549	0.0595813	0.173779	51614	ERGIC3	cg12630922	serologically defined breast cancer antigen 84 isoform b
NNAT_P544_R	-0.0666	0.3	0.583882	0.947046	0.2203	1.877	0.170676	0.351391	0.1043	1.877	0.170676	0.351391	4826	NNAT	cg10288563	neuronatin isoform beta
PYCARD_P150_F	0.0558	0.299	0.58451	0.947046	0.0554	0.154	0.694742	0.814927	0.0283	0.154	0.694742	0.814927	29108	PYCARD	cg15468095	PYD and CARD domain containing isoform b
HPN_P823_F	-0.0705	0.279	0.597357	0.961265	-0.1189	3.01	0.0827523	0.214543	-0.1352	3.01	0.0827523	0.214543	3249	HPN	cg00566101	hepsin (transmembrane protease, serine 1)
FZD9_P175_F	-0.057	0.265	0.606706	0.970729	0.0406	0.122	0.726875	0.829795	-0.0263	0.122	0.726875	0.829795	8326	FZD9	cg01706139	frizzled 9
DSC2_E90_F	0.0318	0.084	0.771948	0.982444	0.3531	7.279	0.00697654	0.0376707	0.1975	7.279	0.00697654	0.0376707	1824	DSC2	cg08156793	desmocollin 2 isoform Dsc2a preproprotein
CDH11_P354_R	0.0513	0.231	0.630783	0.982444	0.3514	6.973	0.00827487	0.040922	0.191	6.973	0.00827487	0.040922	1009	CDH11	cg13126606	cadherin 11, type 2 preproprotein
AFF3_P122_F	0.0155	0.015	0.902523	0.982444	0.2965	5.837	0.0156926	0.0665745	0.1861	5.837	0.0156926	0.0665745	3899	AFF3	cg23497683	AF4/FMR2 family, member 3 isoform 2
LMTK2_P1034_F	-0.0416	0.159	0.690079	0.982444	-0.2769	5.482	0.0192133	0.0779669	-0.1678	5.482	0.0192133	0.0779669	22853	LMTK2	cg09406250	lemur tyrosine kinase 2
HRASLS_P353_R	-0.0626	0.24	0.624206	0.982444	-0.266	5.365	0.0205448	0.0821792	-0.1835	5.365	0.0205448	0.0821792	57110	HRASLS	cg14777903	HRAS-like suppressor
HLA-DPA1_E35_R	-0.0488	0.178	0.673098	0.982444	-0.2529	5.224	0.0222773	0.0866338	-0.1704	5.224	0.0222773	0.0866338	3113	HLA-DPA1	cg09321817	major histocompatibility complex, class II, DP alpha 1 precursor
TFPI2_P152_R	0.0423	0.157	0.691934	0.982444	0.2469	5.072	0.0243153	0.0920039	0.1596	5.072	0.0243153	0.0920039	7980	TFPI2	cg12005526	tissue factor pathway inhibitor 2
GFAP_P1214_F	-0.0531	0.246	0.619906	0.982444	-0.265	4.788	0.0286587	0.106992	-0.1555	4.788	0.0286587	0.106992	2670	GFAP	cg15193977	glial fibrillary acidic protein
GRPR_P200_R	-0.0267	0.068	0.794271	0.982444	-0.1401	4.451	0.0348808	0.122226	-0.1296	4.451	0.0348808	0.122226	2925	GRPR	cg26196133	gastrin-releasing peptide receptor
IRF5_E101_F	-0.0094	0.007	0.933322	0.982444	0.2656	4.466	0.0345758	0.122226	0.1633	4.466	0.0345758	0.122226	3663	IRF5	cg02343258	interferon regulatory factor 5 isoform b
SLC22A3_P528_F	-0.0369	0.103	0.748259	0.982444	0.2955	4.24	0.0394822	0.130059	0.1569	4.24	0.0394822	0.130059	6581	SLC22A3	cg23001073	solute carrier family 22 member 3
IHH_P246_R	-0.0266	0.06	0.806496	0.982444	0.2721	3.435	0.0638286	0.184247	0.1361	3.435	0.0638286	0.184247	3549	IHH	cg06266124	Indian hedgehog homolog
GRB7_P160_R	0.022	0.036	0.849515	0.982444	0.2394	3.392	0.0655134	0.187181	0.14	3.392	0.0655134	0.187181	2886	GRB7	cg08284496	growth factor receptor-bound protein 7
GSTM2_P453_R	0.0157	0.017	0.896263	0.982444	-0.228	3.133	0.0767224	0.202663	-0.1366	3.133	0.0767224	0.202663	2946	GSTM2	cg11063364	glutathione S-transferase M2
PLAGL1_E68_R	-0.0412	0.179	0.672234	0.982444	-0.1645	2.975	0.0845601	0.215244	-0.1187	2.975	0.0845601	0.215244	5325	PLAGL1	cg12757684	pleiomorphic adenoma gene-like 1 isoform 1
SFRP1_P157_F	0.0229	0.038	0.845443	0.982444	0.2232	2.95	0.0858776	0.216628	0.1314	2.95	0.0858776	0.216628	6422	SFRP1	cg15881237	secreted frizzled-related protein 1
ATP10A_P524_R	0.0212	0.035	0.851596	0.982444	-0.2321	2.653	0.103355	0.242225	-0.122	2.653	0.103355	0.242225	57194	ATP10A	cg18939241	ATPase, Class V, type 10A
CCKBR_P361_R	0.0115	0.012	0.912771	0.982444	0.1604	2.648	0.10368	0.242225	0.1201	2.648	0.10368	0.242225	887	CCKBR	cg10802353	cholecystokinin B receptor
CSF3_P309_R	-0.0552	0.216	0.642105	0.982444	-0.1371	2.646	0.103811	0.242225	-0.1266	2.646	0.103811	0.242225	1440	CSF3	cg17037194	colony stimulating factor 3 isoform c
MAPK4_E273_R	-0.0171	0.021	0.884779	0.982444	-0.211	2.545	0.110644	0.251872	-0.1205	2.545	0.110644	0.251872	5596	MAPK4	cg21612229	mitogen-activated protein kinase 4
DLC1_P88_R	-0.0413	0.108	0.742433	0.982444	0.2335	2.477	0.115522	0.25877	0.1237	2.477	0.115522	0.25877	10395	DLC1	cg08768218	deleted in liver cancer 1 isoform 1
HLA-DQA2_E93_F	-0.0502	0.205	0.650715	0.982444	-0.1743	2.444	0.117975	0.26155	-0.116	2.444	0.117975	0.26155	3118	HLA-DQA2	cg15869057	major histocompatibility complex, class II, DQ alpha 2
NFKB2_P709_R	-0.0424	0.153	0.695685	0.982444	-0.1539	2.384	0.122583	0.264026	-0.1127	2.384	0.122583	0.264026	4791	NFKB2	cg23201134	nuclear factor of kappa light polypeptide gene enhancer in B-cells 2 (p49/p100)
SGCE_P250_R	0.0133	0.016	0.899343	0.982444	-0.1648	2.331	0.12682	0.269013	-0.1132	2.331	0.12682	0.269013	8910	SGCE	cg26050163	sarcoglycan, epsilon
TMEFF1_P234_F	0.0255	0.058	0.809685	0.982444	0.1046	1.762	0.184375	0.376825	0.098	1.762	0.184375	0.376825	8577	TMEFF1	cg24890679	transmembrane protein with EGF-like and two follistatin-like domains 1
TRIP6_P1274_R	-0.0243	0.041	0.839538	0.982444	-0.1711	1.665	0.19693	0.391066	-0.0997	1.665	0.19693	0.391066	7205	TRIP6	cg06647679	thyroid hormone receptor interactor 6
TRIP6_P1090_F	-0.028	0.056	0.812934	0.982444	-0.1592	1.625	0.202396	0.399091	-0.0977	1.625	0.202396	0.399091	7205	TRIP6	cg09357642	thyroid hormone receptor interactor 6
MOS_P746_F	0.0265	0.051	0.821332	0.982444	0.1767	1.496	0.221288	0.424388	0.0871	1.496	0.221288	0.424388	4342	MOS	cg27002178	v-mos Moloney murine sarcoma viral oncogene homolog
CDK10_P199_R	-0.0489	0.162	0.687322	0.982444	-0.1878	1.412	0.234725	0.441884	-0.0928	1.412	0.234725	0.441884	8558	CDK10	cg12119029	cyclin-dependent kinase 10 isoform 2
PLA2G2A_P528_F	0.0125	0.011	0.91647	0.982444	-0.2204	1.406	0.235722	0.441884	-0.0904	1.406	0.235722	0.441884	5320	PLA2G2A	cg09600256	phospholipase A2, group IIA
CHI3L2_P226_F	0.0127	0.01	0.920344	0.982444	0.1428	1.283	0.257342	0.466218	0.0877	1.283	0.257342	0.466218	1117	CHI3L2	cg10675506	chitinase 3-like 2 isoform c
CSF1R_P73_F	-0.0106	0.009	0.924419	0.982444	-0.1659	1.283	0.257342	0.466218	-0.0839	1.283	0.257342	0.466218	1436	CSF1R	cg01875467	colony stimulating factor 1 receptor precursor
EPHA2_P203_F	0.0136	0.014	0.905813	0.982444	0.1522	1.298	0.254579	0.466218	0.0868	1.298	0.254579	0.466218	1969	EPHA2	cg15146752	ephrin receptor EphA2
CCL3_E53_R	-0.0562	0.172	0.67834	0.982444	-0.1387	1.198	0.273722	0.485432	-0.0874	1.198	0.273722	0.485432	6348	CCL3	cg21335375	chemokine (C-C motif) ligand 3
SYBL1_E23_R	0.0487	0.142	0.706301	0.982444	0.1056	1.214	0.270541	0.485432	0.0879	1.214	0.270541	0.485432	6845	SYBL1	cg18199151	synaptobrevin-like 1
CD9_P585_R	-0.0133	0.013	0.909224	0.982444	0.1382	1.121	0.289703	0.49876	0.0807	1.121	0.289703	0.49876	928	CD9	cg19415774	CD9 antigen
FASTK_P598_R	0.0252	0.046	0.830176	0.982444	-0.1735	1.127	0.288416	0.49876	-0.0807	1.127	0.288416	0.49876	10922	FASTK	cg22085103	Fas-activated serine/threonine kinase isoform 4
DKFZP564O0823_P386_F	-0.0287	0.072	0.788447	0.982444	-0.1642	1.006	0.315863	0.529591	-0.0738	1.006	0.315863	0.529591	25849	DKFZP564O0823	cg22860750	DKFZP564O0823 protein
ETS2_P835_F	0.037	0.092	0.76165	0.982444	0.1417	0.978	0.322693	0.537822	0.0769	0.978	0.322693	0.537822	2114	ETS2	cg06712947	v-ets erythroblastosis virus E26 oncogene homolog 2
APC_E117_R	-0.0311	0.087	0.768026	0.982444	-0.1179	0.943	0.331508	0.542819	-0.07	0.943	0.331508	0.542819	324	APC	cg24136097	adenomatosis polyposis coli
TEK_P479_R	0.0487	0.167	0.682792	0.982444	-0.1045	0.95	0.329719	0.542819	-0.0769	0.95	0.329719	0.542819	7010	TEK	cg18721075	TEK tyrosine kinase, endothelial
CHI3L2_E10_F	-0.0117	0.012	0.912771	0.982444	-0.041	0.934	0.333826	0.543437	-0.0735	0.934	0.333826	0.543437	1117	CHI3L2	cg10045881	chitinase 3-like 2 isoform c
TMEFF2_P210_R	-0.0122	0.01	0.920344	0.982444	0.1409	0.906	0.341178	0.545761	0.0745	0.906	0.341178	0.545761	23671	TMEFF2	cg21377961	transmembrane protein with EGF-like and two follistatin-like domains 2
HLA-DOA_P594_F	0.0502	0.208	0.64834	0.982444	-0.1735	0.889	0.345748	0.546947	-0.0684	0.889	0.345748	0.546947	3111	HLA-DOA	cg17313945	major histocompatibility complex, class II, DO alpha precursor
SPARC_E50_R	0.0256	0.059	0.808084	0.982444	0.1399	0.816	0.366352	0.566733	0.0657	0.816	0.366352	0.566733	6678	SPARC	cg03769306	secreted protein, acidic, cysteine-rich (osteonectin)
TNFRSF10B_E198_R	-0.0448	0.133	0.715342	0.982444	-0.0915	0.777	0.37806	0.581631	-0.069	0.777	0.37806	0.581631	8795	TNFRSF10B	cg07508317	tumor necrosis factor receptor superfamily, member 10b isoform 2 precursor
SEMA3B_E96_F	-0.0315	0.085	0.770633	0.982444	0.1731	0.747	0.387428	0.592786	0.0637	0.747	0.387428	0.592786	7869	SEMA3B	cg25047248	semaphorin 3B isoform 1 precursor
EFNB3_E17_R	0.0231	0.044	0.833854	0.982444	-0.1773	0.68	0.409587	0.623284	-0.0616	0.68	0.409587	0.623284	1949	EFNB3	cg20221774	ephrin-B3 precursor
CD34_P780_R	-0.0425	0.143	0.705317	0.982444	-0.0768	0.663	0.415503	0.628869	-0.0608	0.663	0.415503	0.628869	947	CD34	cg14637677	CD34 antigen isoform a
IL8_E118_R	0.0377	0.094	0.759152	0.982444	0.0409	0.641	0.423349	0.633891	0.0631	0.641	0.423349	0.633891	3576	IL8	cg01548201	interleukin 8 precursor
SEMA3A_P658_R	-0.0464	0.187	0.665425	0.982444	0.1779	0.61	0.434788	0.641851	0.0573	0.61	0.434788	0.641851	10371	SEMA3A	cg00927350	semaphorin 3A
WNT5A_E43_F	0.0102	0.008	0.92873	0.982444	0.0438	0.564	0.452653	0.65903	0.0572	0.564	0.452653	0.65903	7474	WNT5A	cg16891776	wingless-type MMTV integration site family, member 5A precursor
TNK1_P221_F	0.0221	0.036	0.849515	0.982444	-0.1034	0.511	0.474706	0.667928	-0.0536	0.511	0.474706	0.667928	8711	TNK1	cg26000767	tyrosine kinase, non-receptor, 1
MMP3_P55_F	0.0389	0.123	0.725803	0.982444	0.0785	0.482	0.487518	0.679129	0.0512	0.482	0.487518	0.679129	4314	MMP3	cg01026111	matrix metalloproteinase 3 preproprotein
SLC22A3_P634_F	-0.044	0.127	0.721563	0.982444	0.1332	0.425	0.514453	0.706111	0.0511	0.425	0.514453	0.706111	6581	SLC22A3	cg13523841	solute carrier family 22 member 3
CSF3R_P472_F	-0.0427	0.137	0.711282	0.982444	-0.0376	0.378	0.538676	0.721671	-0.0463	0.378	0.538676	0.721671	1441	CSF3R	cg07285167	colony stimulating factor 3 receptor isoform d precursor
SHH_E328_F	0.0245	0.047	0.828368	0.982444	0.0294	0.378	0.538676	0.721671	0.0463	0.378	0.538676	0.721671	6469	SHH	cg02023134	sonic hedgehog preproprotein
WRN_E57_F	0.0205	0.036	0.849515	0.982444	-0.1452	0.389	0.532826	0.721671	-0.046	0.389	0.532826	0.721671	7486	WRN	cg27071045	Werner syndrome protein
ITGB1_P451_F	-0.025	0.053	0.817923	0.982444	-0.0829	0.346	0.556386	0.7314	-0.0434	0.346	0.556386	0.7314	3688	ITGB1	cg03222924	integrin beta 1 isoform 1C-1 precursor
DUSP4_E61_F	-0.0136	0.016	0.899343	0.982444	0.0603	0.341	0.559253	0.731732	0.0429	0.341	0.559253	0.731732	1846	DUSP4	cg13071058	dual specificity phosphatase 4 isoform 1
SEPT9_P58_R	0.0473	0.145	0.70336	0.982444	0.0641	0.31	0.57768	0.748845	0.0439	0.31	0.57768	0.748845	10801	2009-09-09	cg05428394	septin 9
EPHB4_P313_R	-0.0159	0.022	0.882087	0.982444	0.0791	0.297	0.585769	0.752364	0.0402	0.297	0.585769	0.752364	2050	EPHB4	cg22614265	ephrin receptor EphB4 precursor
YES1_P600_F	-0.0102	0.009	0.924419	0.982444	0.0643	0.266	0.606028	0.767818	0.0378	0.266	0.606028	0.767818	7525	YES1	cg02999287	viral oncogene yes-1 homolog 1
IGF2AS_E4_F	-0.0192	0.031	0.86024	0.982444	-0.0358	0.251	0.616372	0.777406	-0.037	0.251	0.616372	0.777406	51214	IGF2AS	cg16130058	insulin-like growth factor 2 antisense
VAMP8_P241_F	0.0308	0.066	0.797252	0.982444	-0.1044	0.246	0.619906	0.778357	-0.0383	0.246	0.619906	0.778357	8673	VAMP8	cg05486094	vesicle-associated membrane protein 8
MCC_E23_R	-0.0407	0.124	0.724736	0.982444	-0.0255	0.238	0.625654	0.778592	-0.0372	0.238	0.625654	0.778592	4163	MCC	cg10599443	mutated in colorectal cancers
NTRK2_P395_R	0.0504	0.193	0.660431	0.982444	0.0145	0.234	0.628574	0.778764	0.0367	0.234	0.628574	0.778764	4915	NTRK2	cg07764593	neurotrophic tyrosine kinase, receptor, type 2 isoform e precursor
PSCA_E359_F	-0.0447	0.123	0.725803	0.982444	-0.0067	0.193	0.660431	0.800523	-0.0349	0.193	0.660431	0.800523	8000	PSCA	cg20546389	prostate stem cell antigen
CRIP1_P874_R	0.0156	0.017	0.896263	0.982444	0.0289	0.147	0.701419	0.814927	0.0296	0.147	0.701419	0.814927	1396	CRIP1	cg03324382	cysteine-rich protein 1 (intestinal)
IL8_P83_F	-0.0187	0.03	0.86249	0.982444	-0.0231	0.16	0.689157	0.814927	-0.0295	0.16	0.689157	0.814927	3576	IL8	cg18302652	interleukin 8 precursor
MMP14_P208_R	-0.011	0.009	0.924419	0.982444	-0.0296	0.151	0.697582	0.814927	-0.03	0.151	0.697582	0.814927	4323	MMP14	cg01508380	matrix metalloproteinase 14 preproprotein
SFTPA1_P421_F	0.021	0.03	0.86249	0.982444	0.0792	0.175	0.675706	0.814927	0.0327	0.175	0.675706	0.814927	6435	SFTPA1	cg27452691	surfactant, pulmonary-associated protein A1
COMT_E401_F	-0.0445	0.15	0.698535	0.982444	0.0068	0.143	0.705317	0.814983	-0.0287	0.143	0.705317	0.814983	1312	COMT	cg24164157	catechol-O-methyltransferase isoform S-COMT
DNMT2_P199_F	0.0235	0.048	0.826581	0.982444	-0.0468	0.116	0.733414	0.8314	-0.0244	0.116	0.733414	0.8314	1787	DNMT2	cg19579782	DNA methyltransferase 2 isoform a
TEK_P526_F	0.0154	0.02	0.887537	0.982444	-0.0724	0.112	0.737879	0.833089	-0.0243	0.112	0.737879	0.833089	7010	TEK	cg04687350	TEK tyrosine kinase, endothelial
GABRA5_E44_R	-0.0237	0.047	0.828368	0.982444	-0.0294	0.109	0.741286	0.833574	-0.0243	0.109	0.741286	0.833574	2558	GABRA5	cg17525249	gamma-aminobutyric acid (GABA) A receptor, alpha 5 precursor
ELL_P693_F	-0.0465	0.141	0.707289	0.982444	0.0285	0.089	0.765452	0.853891	0.0235	0.089	0.765452	0.853891	8178	ELL	cg09597048	elongation factor RNA polymerase II
FGFR4_P610_F	0.0307	0.071	0.789886	0.982444	-0.0794	0.07	0.791337	0.87234	-0.0198	0.07	0.791337	0.87234	2264	FGFR4	cg13847825	fibroblast growth factor receptor 4 isoform 1 precursor
RUNX3_P247_F	-0.0098	0.007	0.933322	0.982444	0.0467	0.036	0.849515	0.918395	0.0143	0.036	0.849515	0.918395	864	RUNX3	cg10672665	runt-related transcription factor 3 isoform 1
EGR4_P479_F	0.0481	0.19	0.662917	0.982444	-0.0554	0.033	0.85585	0.921685	0.0136	0.033	0.85585	0.921685	1961	EGR4	cg21111868	early growth response 4
PECAM1_E32_R	0.0187	0.026	0.8719	0.982444	0.0304	0.024	0.876885	0.930029	0.0119	0.024	0.876885	0.930029	5175	PECAM1	cg12476586	platelet/endothelial cell adhesion molecule (CD31 antigen)
FHIT_E19_R	-0.0337	0.103	0.748259	0.982444	-0.0305	0.013	0.909224	0.957078	-0.0085	0.013	0.909224	0.957078	2272	FHIT	cg16465895	fragile histidine triad gene
SYK_P584_F	0.0255	0.053	0.817923	0.982444	-0.0424	0.012	0.912771	0.957213	-0.008	0.012	0.912771	0.957213	6850	SYK	cg06713470	spleen tyrosine kinase
CDK6_E256_F	0.0306	0.086	0.769325	0.982444	-0.1159	0.007	0.933322	0.971488	-0.0063	0.007	0.933322	0.971488	1021	CDK6	cg19493914	cyclin-dependent kinase 6
TIE1_E66_R	-0.0256	0.05	0.823063	0.982444	5.0855e-06	0.007	0.933322	0.971488	-0.0065	0.007	0.933322	0.971488	7075	TIE1	cg19492156	tyrosine kinase with immunoglobulin-like and EGF-like domains 1
CYP1B1_E83_R	0.0209	0.037	0.847465	0.982444	-0.0399	0.006	0.938258	0.973008	0.0056	0.006	0.938258	0.973008	1545	CYP1B1	cg09991178	cytochrome P450, family 1, subfamily B, polypeptide 1
STK11_P295_R	-0.0135	0.014	0.905813	0.982444	-0.0078	0.003	0.95632	0.977261	0.004	0.003	0.95632	0.977261	6794	STK11	cg12871083	serine/threonine protein kinase 11
IRF7_E236_R	-0.027	0.062	0.803362	0.982444	0.0367	0.001	0.974773	0.98533	0.0023	0.001	0.974773	0.98533	3665	IRF7	cg11519262	interferon regulatory factor 7 isoform b
MMP9_E88_R	-0.0298	0.068	0.794271	0.982444	-0.0015	0.001	0.974773	0.98533	0.0021	0.001	0.974773	0.98533	4318	MMP9	cg05437645	matrix metalloproteinase 9 preproprotein
BCL6_P248_R	-0.0343	0.1	0.75183	0.982444	0.0671	0	1	1	0.00014113	0	1	1	604	BCL6	cg20717875	B-cell lymphoma 6 protein
SLC22A18_P216_R	-0.0401	0.111	0.739009	0.982444	0.045	0	1	1	-0.0014	0	1	1	5002	SLC22A18	cg25427871	tumor suppressing subtransferable candidate 5
HHIP_P578_R	0.0079	0.004	0.949571	0.9889	0.2498	4.06	0.0439105	0.13661	0.1604	4.06	0.0439105	0.13661	64399	HHIP	cg02524475	hedgehog-interacting protein
F2R_P839_F	0.0046	0.002	0.964329	0.9889	0.2577	3.161	0.075417	0.201112	0.1335	3.161	0.075417	0.201112	2149	F2R	cg03231644	coagulation factor II receptor precursor
HLA-DPB1_E2_R	-0.0049	0.002	0.964329	0.9889	-0.1885	2.424	0.119489	0.26155	-0.1156	2.424	0.119489	0.26155	3115	HLA-DPB1	cg12899649	major histocompatibility complex, class II, DP beta 1 precursor
SLC5A8_P38_R	-0.0044	0.001	0.974773	0.9889	0.0966	1.279	0.258085	0.466218	0.0877	1.279	0.258085	0.466218	160728	SLC5A8	cg13433302	solute carrier family 5 (iodide transporter), member 8
FLT1_P615_R	0.0028	0.001	0.974773	0.9889	0.0925	1.197	0.273922	0.485432	0.0795	1.197	0.273922	0.485432	2321	FLT1	cg26282369	fms-related tyrosine kinase 1 (vascular endothelial growth factor/vascular permeability factor receptor)
PADI4_E24_F	-0.0037	0.001	0.974773	0.9889	0.1466	0.859	0.354019	0.556883	0.0732	0.859	0.354019	0.556883	23569	PADI4	cg18333690	peptidyl arginine deiminase, type IV
SPI1_P929_F	-0.0033	0.001	0.974773	0.9889	0.0993	0.432	0.511009	0.70484	0.0493	0.432	0.511009	0.70484	6688	SPI1	cg04692506	spleen focus forming virus (SFFV) proviral integration oncogene spi1
THY1_P20_R	-0.0061	0.002	0.964329	0.9889	-0.041	0.228	0.633011	0.780806	-0.0375	0.228	0.633011	0.780806	7070	THY1	cg11980653	Thy-1 cell surface antigen
KCNQ1_E349_R	-0.0076	0.005	0.943628	0.9889	0.065	0.12	0.729034	0.829795	0.0256	0.12	0.729034	0.829795	3784	KCNQ1	cg19576908	potassium voltage-gated channel, KQT-like subfamily, member 1 isoform 3
GDF10_E39_F	-0.0027	0.001	0.974773	0.9889	-0.011	0.036	0.849515	0.918395	0.0139	0.036	0.849515	0.918395	2662	GDF10	cg16738009	growth differentiation factor 10 precursor
MAPK14_P327_R	-0.0017	0	1	1	0.2478	2.76	0.0966482	0.233289	0.1216	2.76	0.0966482	0.233289	1432	MAPK14	cg18213931	mitogen-activated protein kinase 14 isoform 3
DIO3_E230_R	0.00026907	0	1	1	0.2162	2.661	0.102836	0.242225	0.1241	2.661	0.102836	0.242225	1735	DIO3	cg18191511	deiodinase, iodothyronine, type III
MAD2L1_E93_F	-0.0016	0	1	1	-0.0545	0.203	0.65231	0.794117	-0.0323	0.203	0.65231	0.794117	4085	MAD2L1	cg08483943	MAD2-like 1
PTHLH_P15_R	-0.00058843	0	1	1	0.0363	0.123	0.725803	0.829795	0.0272	0.123	0.725803	0.829795	5744	PTHLH	cg05045983	parathyroid hormone-like hormone isoform 2 preproprotein
