# Supplementary material for: The Relationship of DNA Methylation with Age, Gender and Genotype in Twins and Healthy Controls
Source: PLoS One. 2009 Aug 26;4(8):e6767. doi: 10.1371/journal.pone.0006767 (PMC2747671; doi:10.1371/journal.pone.0006767)
Supplement: Table S2 — Full gender results (0.13 MB DOC) [file pone.0006767.s002.xls]

## Sheet: table_gen_mx
	Twins				Singletons				Combined
probe	B	Chi2	p	p.fdr	B.x	Chi2.x	p.x	p.fdr.x	B.y	Chi2.y	p.y	p.fdr.y	GeneID	Symbol	CGnr	product
NDN_E131_R	1.0281	23.063	1.56779e-06	0.000438981	0.4873	26.13	3.19186e-07	1.78744e-05	0.7491	26.13	3.19186e-07	1.78744e-05	4692	NDN	cg10021600	necdin
PLAGL1_E68_R	0.8832	17.177	3.40534e-05	0.00476748	0.6282	24.507	7.40404e-07	3.45522e-05	0.7125	24.507	7.40404e-07	3.45522e-05	5325	PLAGL1	cg12757684	pleiomorphic adenoma gene-like 1 isoform 1
XPC_P226_R	0.9043	14.454	0.000143625	0.013405	0.5527	20.202	6.968e-06	0.000195104	0.6879	20.202	6.968e-06	0.000195104	7508	XPC	cg23512686	xeroderma pigmentosum, complementation group C
DNMT2_P199_F	0.8584	13.209	0.000278608	0.015602	0.6858	23.858	1.0371e-06	4.1484e-05	0.7364	23.858	1.0371e-06	4.1484e-05	1787	DNMT2	cg19579782	DNA methyltransferase 2 isoform a
ERN1_P809_R	-0.8677	13.505	0.000237929	0.015602	-0.4682	22.692	1.90158e-06	6.65553e-05	-0.6774	22.692	1.90158e-06	6.65553e-05	2081	ERN1	cg13884260	endoplasmic reticulum to nucleus signalling 1 isoform 1
EVI2A_E420_F	0.8156	12.815	0.000343851	0.0160464	0.7957	30.494	3.34901e-08	2.3443e-06	0.8161	30.494	3.34901e-08	2.3443e-06	2123	EVI2A	cg14414427	ecotropic viral integration site 2A isoform 1
PYCARD_P150_F	0.7563	11.67	0.00063516	0.0222306	0.2629	10.5	0.00119375	0.0119375	0.4868	10.5	0.00119375	0.0119375	29108	PYCARD	cg15468095	PYD and CARD domain containing isoform b
SGCE_P250_R	0.8028	11.878	0.000568009	0.0222306	0.2793	9.005	0.00269242	0.0198389	0.4597	9.005	0.00269242	0.0198389	8910	SGCE	cg26050163	sarcoglycan, epsilon
CHI3L2_E10_F	0.7807	11.135	0.000847139	0.0263554	-0.0611	3.392	0.0655134	0.189111	0.2874	3.392	0.0655134	0.189111	1117	CHI3L2	cg10045881	chitinase 3-like 2 isoform c
TDGF1_P428_R	0.7908	10.777	0.00102769	0.0287754	1.05	41.315	1.29571e-10	1.81399e-08	0.9521	41.315	1.29571e-10	1.81399e-08	6997	TDGF1	cg04728702	teratocarcinoma-derived growth factor 1
TEK_P479_R	0.8239	10.164	0.0014321	0.0364533	0.1503	5.3	0.0213254	0.086538	0.3682	5.3	0.0213254	0.086538	7010	TEK	cg18721075	TEK tyrosine kinase, endothelial
PTHR1_P258_F	0.7201	9.892	0.00165999	0.0387331	0.6109	17.822	2.42562e-05	0.000617432	0.6068	17.822	2.42562e-05	0.000617432	5745	PTHR1	cg13804333	parathyroid hormone receptor 1 precursor
AREG_P217_R	0.667	9.102	0.0025533	0.0549942	0.0608	5.402	0.0201137	0.0840572	0.3536	5.402	0.0201137	0.0840572	374	AREG	cg23375843	amphiregulin preproprotein
GRPR_P200_R	-0.6542	8.957	0.00276408	0.0552817	1.0914	64.941	7.77156e-16	2.17604e-13	1.0901	64.941	7.77156e-16	2.17604e-13	2925	GRPR	cg26196133	gastrin-releasing peptide receptor
FLT1_P615_R	-0.6402	8.519	0.00351458	0.0656054	-0.0948	4.779	0.0288088	0.112034	-0.3249	4.779	0.0288088	0.112034	2321	FLT1	cg26282369	fms-related tyrosine kinase 1 (vascular endothelial growth factor/vascular permeability factor receptor)
CCKBR_P361_R	-0.6547	8.393	0.00376669	0.065917	-0.1086	4.419	0.0355409	0.119897	-0.318	4.419	0.0355409	0.119897	887	CCKBR	cg10802353	cholecystokinin B receptor
EPHA5_P66_F	0.6676	8.251	0.00407296	0.067084	0.2708	9.449	0.00211264	0.0179255	0.4547	9.449	0.00211264	0.0179255	2044	EPHA5	cg02463418	ephrin receptor EphA5 isoform b
MAD2L1_E93_F	0.6546	8.076	0.00448553	0.069775	0.605	16.724	4.32306e-05	0.000878394	0.6104	16.724	4.32306e-05	0.000878394	4085	MAD2L1	cg08483943	MAD2-like 1
PRSS1_P1249_R	0.6081	7.677	0.00559291	0.0824218	0.6763	16.515	4.82667e-05	0.000900979	0.592	16.515	4.82667e-05	0.000900979	5644	PRSS1	cg09471643	protease, serine, 1 preproprotein
HLA-DOA_P594_F	0.636	7.224	0.00719352	0.100709	0.6968	16.694	4.39197e-05	0.000878394	0.6147	16.694	4.39197e-05	0.000878394	3111	HLA-DOA	cg17313945	major histocompatibility complex, class II, DO alpha precursor
RUNX3_P247_F	0.6542	7.076	0.00781232	0.104164	0.4947	13.618	0.000224027	0.00330145	0.5691	13.618	0.000224027	0.00330145	864	RUNX3	cg10672665	runt-related transcription factor 3 isoform 1
SRC_E100_R	0.5651	6.62	0.010084	0.128342	0.3589	6.922	0.00851417	0.04497	0.3882	6.922	0.00851417	0.04497	6714	SRC	cg05935845	proto-oncogene tyrosine-protein kinase SRC
SEPT5_P441_F	-0.5592	6.534	0.0105832	0.128839	-0.7127	16.2	5.69941e-05	0.000981294	-0.5844	16.2	5.69941e-05	0.000981294	5413	2009-09-05	cg11788728	septin 5 isoform 2
GFAP_P1214_F	0.5734	6.445	0.0111265	0.129809	0.7436	17.637	2.67336e-05	0.000623785	0.6137	17.637	2.67336e-05	0.000623785	2670	GFAP	cg15193977	glial fibrillary acidic protein
MMP3_P55_F	0.59	6.293	0.0121216	0.13054	0.4119	10.683	0.00108125	0.0112129	0.4945	10.683	0.00108125	0.0112129	4314	MMP3	cg01026111	matrix metalloproteinase 3 preproprotein
CCND3_P435_F	-0.6119	6.296	0.0121011	0.13054	-0.0484	2.543	0.110784	0.268428	-0.2486	2.543	0.110784	0.268428	896	CCND3	cg22537023	cyclin D3
GDF10_E39_F	-0.5632	6.182	0.0129056	0.133836	-0.1821	5.521	0.0187895	0.0822041	-0.3537	5.521	0.0187895	0.0822041	2662	GDF10	cg16738009	growth differentiation factor 10 precursor
MOS_P746_F	-0.6106	5.956	0.0146673	0.146344	-1.091	32.58	1.14386e-08	1.0676e-06	-0.8569	32.58	1.14386e-08	1.0676e-06	4342	MOS	cg27002178	v-mos Moloney murine sarcoma viral oncogene homolog
AATK_P519_R	0.5337	5.82	0.0158449	0.146344	0.5132	11.875	0.000568925	0.00724086	0.5054	11.875	0.000568925	0.00724086	9625	AATK	cg17279079	apoptosis-associated tyrosine kinase
PPARG_P693_F	-0.5678	5.74	0.0165828	0.146344	-0.5567	11.621	0.000652113	0.00793877	-0.5171	11.621	0.000652113	0.00793877	5468	PPARG	cg27051533	peroxisome proliferative activated receptor gamma isoform 1
LMTK2_P1034_F	0.5325	5.88	0.0153138	0.146344	0.4407	8.553	0.00344953	0.0241467	0.4251	8.553	0.00344953	0.0241467	22853	LMTK2	cg09406250	lemur tyrosine kinase 2
CDK6_E256_F	-0.5263	5.725	0.016725	0.146344	0.1602	1.662	0.197334	0.418586	-0.1916	1.662	0.197334	0.418586	1021	CDK6	cg19493914	cyclin-dependent kinase 6
USP29_P205_R	0.5557	5.461	0.0194455	0.164992	0.3914	6.747	0.00939054	0.0472961	0.3988	6.747	0.00939054	0.0472961	57663	USP29	cg25357752	ubiquitin specific protease 29
SIN3B_P607_F	0.5784	5.401	0.0201252	0.165737	-0.1172	1.134	0.286924	0.52168	0.1681	1.134	0.286924	0.52168	23309	SIN3B	cg22629500	SIN3 homolog B, transcription regulator
PDE1B_E141_F	0.5515	5.139	0.0233941	0.187153	0.1087	3.873	0.0490687	0.15284	0.3079	3.873	0.0490687	0.15284	5153	PDE1B	cg15927682	phosphodiesterase 1B, calmodulin-dependent
FHIT_E19_R	-0.5081	5.071	0.0243293	0.189228	-0.0748	3.17	0.0750024	0.210007	-0.2704	3.17	0.0750024	0.210007	2272	FHIT	cg16465895	fragile histidine triad gene
E2F5_P516_R	0.5361	5.015	0.0251286	0.190163	0.4992	14.155	0.000168349	0.00261876	0.5709	14.155	0.000168349	0.00261876	1875	E2F5	cg04207142	E2F transcription factor 5
SPP1_P647_F	-0.5457	4.849	0.0276622	0.203826	-0.1102	2.945	0.0861437	0.229717	-0.2671	2.945	0.0861437	0.229717	6696	SPP1	cg24861509	secreted phosphoprotein 1
DKFZP564O0823_P386_F	-0.4838	4.725	0.0297272	0.213426	-0.0184	3.075	0.0795046	0.218248	-0.2632	3.075	0.0795046	0.218248	25849	DKFZP564O0823	cg22860750	DKFZP564O0823 protein
ATP10A_P524_R	0.5129	4.537	0.0331697	0.224517	0.4452	7.36	0.00666908	0.0366146	0.4139	7.36	0.00666908	0.0366146	57194	ATP10A	cg18939241	ATPase, Class V, type 10A
SPARC_E50_R	0.4703	4.511	0.0336775	0.224517	0.1339	4.538	0.0331503	0.118064	0.3146	4.538	0.0331503	0.118064	6678	SPARC	cg03769306	secreted protein, acidic, cysteine-rich (osteonectin)
PEG3_E496_F	0.493	4.532	0.0332667	0.224517	0.1167	2.488	0.114717	0.272211	0.2384	2.488	0.114717	0.272211	5178	PEG3	cg07299214	paternally expressed 3
HOXA5_P1324_F	0.541	4.254	0.039158	0.23549	0.3801	9.694	0.00184871	0.0170284	0.4954	9.694	0.00184871	0.0170284	3202	HOXA5	cg05640017	homeobox A5
PHLDA2_P622_F	0.531	4.378	0.0364057	0.23549	0.466	9.393	0.00217815	0.0179377	0.4782	9.393	0.00217815	0.0179377	7262	PHLDA2	cg07667013	pleckstrin homology-like domain family A member 2
SPI1_P929_F	0.4985	4.238	0.0395287	0.23549	0.4002	9.005	0.00269242	0.0198389	0.4603	9.005	0.00269242	0.0198389	6688	SPI1	cg04692506	spleen focus forming virus (SFFV) proviral integration oncogene spi1
ZAP70_P220_R	0.4909	4.332	0.0374023	0.23549	0.3676	8.193	0.00420523	0.0280349	0.4354	8.193	0.00420523	0.0280349	7535	ZAP70	cg09006159	zeta-chain associated protein kinase 70kDa isoform 1
APC_E117_R	-0.4568	4.249	0.0392734	0.23549	-0.3486	8.02	0.00462636	0.0294405	-0.4161	8.02	0.00462636	0.0294405	324	APC	cg24136097	adenomatosis polyposis coli
THY1_P149_R	-0.4333	4.094	0.0430357	0.251041	0.2081	0.834	0.361118	0.598303	-0.1344	0.834	0.361118	0.598303	7070	THY1	cg18809507	Thy-1 cell surface antigen
SNURF_P2_R	0.4727	3.903	0.0482	0.263586	0.5128	11.19	0.000822393	0.00921081	0.5112	11.19	0.000822393	0.00921081	8926	SNURF	cg17916021	SNRPN upstream reading frame protein
WNT1_P79_R	0.4288	3.79	0.0515596	0.263586	0.3589	10.146	0.00144615	0.0139628	0.4468	10.146	0.00144615	0.0139628	7471	WNT1	cg08133093	wingless-type MMTV integration site family, member 1 precursor
WNT10B_P823_R	0.4345	3.862	0.0493914	0.263586	0.344	9.538	0.00201261	0.0176103	0.4424	9.538	0.00201261	0.0176103	7480	WNT10B	cg23890019	wingless-type MMTV integration site family, member 10B precursor
IFNGR2_P377_R	-0.4779	3.908	0.0480568	0.263586	-0.428	7.429	0.0064181	0.0359414	-0.4142	7.429	0.0064181	0.0359414	3460	IFNGR2	cg21449657	interferon-gamma receptor beta chain precursor
ICAM1_E242_F	-0.4303	3.783	0.0517758	0.263586	-0.3538	5.483	0.0192023	0.0827175	-0.3461	5.483	0.0192023	0.0827175	3383	ICAM1	cg20539223	intercellular adhesion molecule 1 precursor
CPA4_E20_F	0.4369	3.866	0.0492738	0.263586	0.2758	3.608	0.0575022	0.172732	0.2728	3.608	0.0575022	0.172732	51200	CPA4	cg01796223	carboxypeptidase A4 preproprotein
CSF3_P309_R	0.4865	3.803	0.0511608	0.263586	0.0191	1.4	0.236724	0.460296	0.1853	1.4	0.236724	0.460296	1440	CSF3	cg17037194	colony stimulating factor 3 isoform c
SERPINA5_P156_F	0.4487	3.726	0.0535715	0.267858	0.2233	4.639	0.0312532	0.118064	0.3183	4.639	0.0312532	0.118064	5104	SERPINA5	cg13984563	serine (or cysteine) proteinase inhibitor, clade A (alpha-1 antiproteinase, antitrypsin), member 5
FZD9_P175_F	0.4499	3.656	0.0558676	0.273621	0.0435	2.434	0.11873	0.279364	0.2404	2.434	0.11873	0.279364	8326	FZD9	cg01706139	frizzled 9
TMEFF1_P234_F	-0.4243	3.632	0.0566787	0.273621	0.1388	0.464	0.49576	0.71723	-0.102	0.464	0.49576	0.71723	8577	TMEFF1	cg24890679	transmembrane protein with EGF-like and two follistatin-like domains 1
PXN_P308_F	-0.4475	3.55	0.0595455	0.282589	-0.1607	4.564	0.0326507	0.118064	-0.3153	4.564	0.0326507	0.118064	5829	PXN	cg16785344	paxillin
CDKN2B_E220_F	-0.4157	3.509	0.0610363	0.284836	0.3337	0.045	0.832004	0.9457	-0.0316	0.045	0.832004	0.9457	1030	CDKN2B	cg18731427	cyclin-dependent kinase inhibitor 2B isoform 1
PTPRH_E173_F	0.4332	3.38	0.0659921	0.302914	0.1844	3.181	0.0744991	0.210007	0.2715	3.181	0.0744991	0.210007	5794	PTPRH	cg09948821	protein tyrosine phosphatase, receptor type, H precursor
DSC2_E90_F	0.4174	3.351	0.0671642	0.303322	0.2852	7.938	0.00484073	0.0301201	0.416	7.938	0.00484073	0.0301201	1824	DSC2	cg08156793	desmocollin 2 isoform Dsc2a preproprotein
B3GALT5_E246_R	0.4001	3.314	0.0686921	0.305298	0.6582	12.403	0.000428645	0.00600103	0.5022	12.403	0.000428645	0.00600103	10317	B3GALT5	cg11479877	UDP-Gal:betaGlcNAc beta 1,3-galactosyltransferase 5
TEK_P526_F	0.4086	3.242	0.071773	0.309176	0.5183	8.949	0.00277622	0.0199318	0.4447	8.949	0.00277622	0.0199318	7010	TEK	cg04687350	TEK tyrosine kinase, endothelial
SFTPA1_P421_F	0.4579	3.267	0.0706868	0.309176	0.0103	1.546	0.213727	0.434936	0.1971	1.546	0.213727	0.434936	6435	SFTPA1	cg27452691	surfactant, pulmonary-associated protein A1
CRIP1_P874_R	-0.4425	3.094	0.0785814	0.333376	-0.3199	5.428	0.0198164	0.0840572	-0.3648	5.428	0.0198164	0.0840572	1396	CRIP1	cg03324382	cysteine-rich protein 1 (intestinal)
ZIM2_E110_F	0.4115	3.017	0.0823958	0.336429	0.4734	9.103	0.00255191	0.0198389	0.4545	9.103	0.00255191	0.0198389	23619	ZIM2	cg07746548	zinc finger, imprinted 2
PCGF4_P760_R	-0.3894	3.049	0.0807869	0.336429	0.1375	0.263	0.608067	0.795601	-0.0773	0.263	0.608067	0.795601	648	PCGF4	cg26800126	polycomb group ring finger 4
DUSP4_P925_R	-0.4286	3.007	0.0829056	0.336429	0.2137	0.02	0.887537	0.9595	0.022	0.02	0.887537	0.9595	1846	DUSP4	cg24336078	dual specificity phosphatase 4 isoform 1
MUC1_E18_R	0.4059	2.908	0.0881411	0.352564	0.2483	4.485	0.0341935	0.118064	0.3236	4.485	0.0341935	0.118064	4582	MUC1	cg00265953	MUC1 mucin isoform 1 precursor
MAP2K6_P297_R	0.3914	2.88	0.089686	0.352882	0.7434	16.116	5.95786e-05	0.000981294	0.5901	16.116	5.95786e-05	0.000981294	5608	MAP2K6	cg23296889	mitogen-activated protein kinase kinase 6 isoform 1
GABRB3_P92_F	-0.3915	2.839	0.0920015	0.352882	-0.1512	2.621	0.105458	0.261806	-0.2445	2.621	0.105458	0.261806	2562	GABRB3	cg16084228	gamma-aminobutyric acid (GABA) A receptor, beta 3 isoform 2 precursor
CLK1_P538_F	0.4155	2.847	0.0915446	0.352882	-0.1296	0.311	0.577067	0.779845	0.0862	0.311	0.577067	0.779845	1195	CLK1	cg08898736	CDC-like kinase 1 isoform 1
SYBL1_P349_F	-0.3698	2.765	0.0963467	0.364555	-0.4933	9.658	0.00188529	0.0170284	-0.4528	9.658	0.00188529	0.0170284	6845	SYBL1	cg11419984	synaptobrevin-like 1
NNAT_P544_R	0.417	2.714	0.0994713	0.371359	0.4828	11.023	0.000899883	0.00969105	0.5154	11.023	0.000899883	0.00969105	4826	NNAT	cg10288563	neuronatin isoform beta
CHGA_P243_F	0.492	2.625	0.105193	0.387551	0.4853	6.889	0.00867278	0.04497	0.4406	6.889	0.00867278	0.04497	1113	CHGA	cg02706439	chromogranin A precursor
TIE1_E66_R	-0.3854	2.6	0.106864	0.388595	-0.291	4.48	0.0342937	0.118064	-0.324	4.48	0.0342937	0.118064	7075	TIE1	cg19492156	tyrosine kinase with immunoglobulin-like and EGF-like domains 1
CHI3L2_P226_F	0.4143	2.553	0.110085	0.390175	0.3689	6.734	0.00945922	0.0472961	0.4085	6.734	0.00945922	0.0472961	1117	CHI3L2	cg10675506	chitinase 3-like 2 isoform c
SEMA3C_P642_F	-0.3696	2.556	0.109876	0.390175	0.0708	0.144	0.704336	0.884369	-0.0582	0.144	0.704336	0.884369	10512	SEMA3C	cg03445665	semaphorin 3C
CDH11_P354_R	0.351	2.484	0.115009	0.397563	0.083	3.594	0.0579885	0.172732	0.2757	3.594	0.0579885	0.172732	1009	CDH11	cg13126606	cadherin 11, type 2 preproprotein
CSPG2_P82_R	-0.3592	2.495	0.114208	0.397563	0.0204	0.456	0.499499	0.71723	-0.1028	0.456	0.499499	0.71723	1462	CSPG2	cg02861411	chondroitin sulfate proteoglycan 2 (versican)
TFPI2_P152_R	0.3473	2.431	0.118957	0.406195	0.553	12.051	0.000517646	0.00690195	0.5015	12.051	0.000517646	0.00690195	7980	TFPI2	cg12005526	tissue factor pathway inhibitor 2
FGF9_P1404_F	0.3535	2.366	0.124004	0.413348	0.2218	4.509	0.0337169	0.118064	0.323	4.509	0.0337169	0.118064	2254	FGF9	cg18000242	fibroblast growth factor 9 precursor
CASP10_E139_F	-0.3376	2.37	0.123687	0.413348	0.3456	0.14	0.708281	0.885351	0.0553	0.14	0.708281	0.885351	843	CASP10	cg20209903	caspase 10 isoform a preproprotein
CD9_P585_R	-0.3656	2.291	0.130126	0.428059	-0.181	2.114	0.145957	0.330444	-0.224	2.114	0.145957	0.330444	928	CD9	cg19415774	CD9 antigen
DIO3_P90_F	0.3454	2.275	0.131475	0.428059	0.0314	1.176	0.278172	0.509073	0.1642	1.176	0.278172	0.509073	1735	DIO3	cg25468490	deiodinase, iodothyronine, type III
HPN_P374_R	-0.3551	2.216	0.136587	0.428569	-0.5663	8.034	0.00459073	0.0294405	-0.4226	8.034	0.00459073	0.0294405	3249	HPN	cg03537100	hepsin (transmembrane protease, serine 1)
TFDP1_P543_R	0.3509	2.215	0.136675	0.428569	0.4942	7.71	0.00549158	0.0327158	0.4186	7.71	0.00549158	0.0327158	7027	TFDP1	cg03399232	transcription factor Dp-1
AOC3_P890_R	0.3095	2.182	0.139633	0.428569	0.3874	6.253	0.0123983	0.0598539	0.354	6.253	0.0123983	0.0598539	8639	AOC3	cg14591538	amine oxidase, copper containing 3 precursor
SYBL1_E23_R	-0.393	2.136	0.143877	0.428569	-0.281	3.638	0.0564747	0.17188	-0.3069	3.638	0.0564747	0.17188	6845	SYBL1	cg18199151	synaptobrevin-like 1
YES1_P600_F	-0.3269	2.151	0.142477	0.428569	-0.1546	2.11	0.146339	0.330444	-0.2157	2.11	0.146339	0.330444	7525	YES1	cg02999287	viral oncogene yes-1 homolog 1
IRF5_E101_F	-0.3665	2.196	0.138369	0.428569	-0.0496	0.556	0.455876	0.678965	-0.1161	0.556	0.455876	0.678965	3663	IRF5	cg02343258	interferon regulatory factor 5 isoform b
RARA_P176_R	0.3553	2.143	0.143222	0.428569	-0.1333	0.558	0.455067	0.678965	0.1119	0.558	0.455067	0.678965	5914	RARA	cg10363722	retinoic acid receptor, alpha isoform a
MPL_P657_F	-0.3751	2.191	0.138819	0.428569	0.1885	0.095	0.757914	0.915926	-0.0476	0.095	0.757914	0.915926	4352	MPL	cg06545304	myeloproliferative leukemia virus oncogene
FGFR4_P610_F	0.341	2.014	0.155854	0.452701	0.5284	7.599	0.00584007	0.0340671	0.4206	7.599	0.00584007	0.0340671	2264	FGFR4	cg13847825	fibroblast growth factor receptor 4 isoform 1 precursor
MAPK4_E273_R	0.3436	2.01	0.156265	0.452701	0.4183	4.956	0.0260003	0.102714	0.3401	4.956	0.0260003	0.102714	5596	MAPK4	cg21612229	mitogen-activated protein kinase 4
FASTK_P257_F	0.3011	1.989	0.158445	0.452701	0.1248	2.794	0.0946178	0.247598	0.2455	2.794	0.0946178	0.247598	10922	FASTK	cg01139039	Fas-activated serine/threonine kinase isoform 4
NGFR_E328_F	0.3121	2	0.157299	0.452701	0.1304	2.193	0.138639	0.318188	0.2166	2.193	0.138639	0.318188	4804	NGFR	cg07426306	nerve growth factor receptor precursor
DIO3_E230_R	0.34591	1.925	0.165307	0.45919	0.3455	6.372	0.0115935	0.0569505	0.3895	6.372	0.0115935	0.0569505	1735	DIO3	cg18191511	deiodinase, iodothyronine, type III
S100A4_P194_R	-0.3282	1.922	0.165636	0.45919	-0.1702	2.797	0.0944409	0.247598	-0.2529	2.797	0.0944409	0.247598	6275	S100A4	cg13091627	S100 calcium-binding protein A4
ARHGDIB_P148_R	0.3574	1.937	0.163995	0.45919	0.1672	1.934	0.164321	0.362284	0.2195	1.934	0.164321	0.362284	397	ARHGDIB	cg15450139	Rho GDP dissociation inhibitor (GDI) beta
ACVR1_E328_R	0.3257	1.897	0.168414	0.462314	0.4307	6.113	0.0134191	0.0618754	0.3328	6.113	0.0134191	0.0618754	90	ACVR1	cg09919801	activin A type I receptor precursor
HDAC1_P414_R	0.335	1.804	0.17923	0.487109	0.4796	7.779	0.0052857	0.0321739	0.4335	7.779	0.0052857	0.0321739	3065	HDAC1	cg24468890	histone deacetylase 1
RAD50_P191_F	0.3355	1.79	0.180926	0.487109	0.2077	4.504	0.0338157	0.118064	0.3398	4.504	0.0338157	0.118064	10111	RAD50	cg05198819	RAD50 homolog isoform 2
TNK1_P221_F	-0.3158	1.705	0.191635	0.509661	-0.426	6.981	0.00823796	0.0443582	-0.404	6.981	0.00823796	0.0443582	8711	TNK1	cg26000767	tyrosine kinase, non-receptor, 1
LIG3_P622_R	0.3219	1.695	0.192943	0.509661	0.4219	6.183	0.0128983	0.0612125	0.3842	6.183	0.0128983	0.0612125	3980	LIG3	cg23104440	ligase III, DNA, ATP-dependent isoform alpha precursor
SERPINE1_P519_F	-0.2912	1.663	0.197199	0.511256	-0.1876	2.618	0.105658	0.261806	-0.2398	2.618	0.105658	0.261806	5054	SERPINE1	cg19722814	plasminogen activator inhibitor-1
KLF5_P13_F	-0.2965	1.673	0.195857	0.511256	0.0283	0.13	0.718432	0.890034	-0.0546	0.13	0.718432	0.890034	688	KLF5	cg16541703	Kruppel-like factor 5
FASTK_P598_R	0.3056	1.573	0.209772	0.512332	0.3961	4.073	0.0435738	0.143537	0.3105	4.073	0.0435738	0.143537	10922	FASTK	cg22085103	Fas-activated serine/threonine kinase isoform 4
HLA-DQA2_E93_F	0.2896	1.582	0.208473	0.512332	0.29	2.994	0.0835735	0.225006	0.2593	2.994	0.0835735	0.225006	3118	HLA-DQA2	cg15869057	major histocompatibility complex, class II, DQ alpha 2
ALPL_P433_F	0.2778	1.582	0.208473	0.512332	0.1939	1.844	0.174483	0.381681	0.2007	1.844	0.174483	0.381681	249	ALPL	cg23352747	tissue non-specific alkaline phosphatase precursor
IGF2AS_E4_F	0.2826	1.562	0.211373	0.512332	0.1188	1.587	0.207755	0.4309	0.1887	1.587	0.207755	0.4309	51214	IGF2AS	cg16130058	insulin-like growth factor 2 antisense
EFNB3_E17_R	-0.2835	1.556	0.212252	0.512332	0.0982	0.638	0.424436	0.655218	-0.1205	0.638	0.424436	0.655218	1949	EFNB3	cg20221774	ephrin-B3 precursor
SLC22A3_P528_F	-0.3051	1.63	0.201703	0.512332	-0.1138	0.635	0.425527	0.655218	-0.1216	0.635	0.425527	0.655218	6581	SLC22A3	cg23001073	solute carrier family 22 member 3
DLL1_P832_F	-0.2775	1.582	0.208473	0.512332	0.231	0.004	0.949571	0.988401	0.0087	0.004	0.949571	0.988401	28514	DLL1	cg10810632	delta-like 1
CRK_P721_F	0.3245	1.58	0.208761	0.512332	-0.2255	0.001	0.974773	0.992496	-0.0049	0.001	0.974773	0.992496	1398	CRK	cg16557332	v-crk sarcoma virus CT10 oncogene homolog isoform b
CD34_P339_R	-0.2695	1.508	0.219445	0.513108	-0.2056	3.871	0.0491272	0.15284	-0.2936	3.871	0.0491272	0.15284	947	CD34	cg03583857	CD34 antigen isoform a
LRRK1_P834_F	0.2867	1.505	0.219904	0.513108	0.2617	3.472	0.0624158	0.182046	0.28	3.472	0.0624158	0.182046	79705	LRRK1	cg24824910	leucine-rich repeat kinase 1
MPO_E302_R	0.2903	1.509	0.219292	0.513108	0.2016	1.753	0.1855	0.402636	0.1954	1.753	0.1855	0.402636	4353	MPO	cg09421562	myeloperoxidase
COMT_E401_F	0.2928	1.507	0.219597	0.513108	0.0618	1.243	0.264894	0.496627	0.1711	1.243	0.264894	0.496627	1312	COMT	cg24164157	catechol-O-methyltransferase isoform S-COMT
SERPINA5_E69_F	0.2938	1.482	0.223462	0.517102	0.3451	2.537	0.111206	0.268428	0.2471	2.537	0.111206	0.268428	5104	SERPINA5	cg08764227	serine (or cysteine) proteinase inhibitor, clade A (alpha-1 antiproteinase, antitrypsin), member 5
ZNF264_P397_F	-0.2901	1.41	0.235056	0.534027	-0.3731	4.466	0.0345758	0.118064	-0.325	4.466	0.0345758	0.118064	9422	ZNF264	cg04803824	zinc finger protein 264
GABRA5_E44_R	0.2684	1.403	0.236222	0.534027	0.3087	3.681	0.0550358	0.169341	0.2866	3.681	0.0550358	0.169341	2558	GABRA5	cg17525249	gamma-aminobutyric acid (GABA) A receptor, alpha 5 precursor
CSF3R_P8_F	-0.2806	1.397	0.237227	0.534027	-0.2571	2.278	0.131221	0.306182	-0.2249	2.278	0.131221	0.306182	1441	CSF3R	cg00474419	colony stimulating factor 3 receptor isoform d precursor
HCK_P46_R	-0.2618	1.39	0.238405	0.534027	0.0273	0.782	0.37653	0.620167	-0.1317	0.782	0.37653	0.620167	3055	HCK	cg15382497	hemopoietic cell kinase isoform p61HCK
PEG10_P978_R	0.2757	1.356	0.244232	0.538078	0.3749	5.531	0.0186824	0.0822041	0.3458	5.531	0.0186824	0.0822041	23089	PEG10	cg07861337	similar to paternally expressed 10
LIF_P383_R	0.257	1.361	0.243364	0.538078	0.2709	3.912	0.0479425	0.152817	0.2924	3.912	0.0479425	0.152817	3976	LIF	cg26721064	leukemia inhibitory factor (cholinergic differentiation factor)
GAS7_P622_R	0.2497	1.346	0.245979	0.538078	0.0183	0.668	0.41375	0.655218	0.1173	0.668	0.41375	0.655218	8522	GAS7	cg10250043	growth arrest-specific 7 isoform a
SEMA3A_P658_R	0.257	1.33	0.248805	0.540042	0.0442	1.709	0.191115	0.411633	0.194	1.709	0.191115	0.411633	10371	SEMA3A	cg00927350	semaphorin 3A
PLAT_P80_F	-0.2792	1.307	0.252939	0.544791	-0.1634	1.013	0.314185	0.534381	-0.1569	1.013	0.314185	0.534381	5327	PLAT	cg02252925	plasminogen activator, tissue type isoform 2 precursor
CD34_P780_R	-0.2641	1.257	0.26222	0.556734	-0.2588	3.094	0.0785814	0.217849	-0.267	3.094	0.0785814	0.217849	947	CD34	cg14637677	CD34 antigen isoform a
SEPT9_P58_R	0.2895	1.253	0.26298	0.556734	0.0219	0.634	0.425892	0.655218	0.1266	0.634	0.425892	0.655218	10801	2009-09-09	cg05428394	septin 9
LTB4R_P163_F	-0.2649	1.235	0.266437	0.556734	-0.0173	0.615	0.432911	0.662378	-0.1191	0.615	0.432911	0.662378	1241	LTB4R	cg14137885	leukotriene B4 receptor
RARA_P1076_R	-0.2559	1.242	0.265086	0.556734	-0.0539	0.538	0.463263	0.682703	-0.1098	0.538	0.463263	0.682703	5914	RARA	cg23685453	retinoic acid receptor, alpha isoform a
CDK2_P330_R	-0.2462	1.217	0.26995	0.559897	0.1484	0.032	0.858028	0.954725	-0.0266	0.032	0.858028	0.954725	1017	CDK2	cg01221216	cyclin-dependent kinase 2 isoform 2
HOXA9_P303_F	-0.2426	1.193	0.274725	0.565611	0.0723	0.064	0.800282	0.933662	-0.0373	0.064	0.800282	0.933662	3205	HOXA9	cg03715906	homeobox protein A9 isoform b
NEU1_P745_F	-0.2408	1.142	0.28523	0.582952	0.1228	0.053	0.817923	0.942463	0.0349	0.053	0.817923	0.942463	4758	NEU1	cg20383155	neuraminidase precursor
STAT5A_P704_R	-0.2598	1.11	0.292082	0.584164	-0.4337	5.334	0.0209133	0.0861137	-0.3561	5.334	0.0209133	0.0861137	6776	STAT5A	cg09355539	signal transducer and activator of transcription 5A
CSF3R_P472_F	-0.2531	1.122	0.289488	0.584164	-0.3694	4.294	0.0382471	0.12749	-0.316	4.294	0.0382471	0.12749	1441	CSF3R	cg07285167	colony stimulating factor 3 receptor isoform d precursor
CD81_P272_R	-0.266	1.113	0.291431	0.584164	0.0125	0.089	0.765452	0.915926	-0.0458	0.089	0.765452	0.915926	975	CD81	cg26129028	CD81 antigen
GNAS_P86_F	0.2477	1.087	0.297137	0.585904	0.582	8.196	0.00419828	0.0280349	0.433	8.196	0.00419828	0.0280349	2778	GNAS	cg14432005	guanine nucleotide binding protein, alpha stimulating activity polypeptide 1 isoform d
NPR2_P618_F	-0.2718	1.088	0.296915	0.585904	-0.0038	0.317	0.573416	0.779401	-0.0899	0.317	0.573416	0.779401	4882	NPR2	cg02519855	natriuretic peptide receptor B precursor
CREBBP_P712_R	-0.2763	1.034	0.309221	0.605468	-0.3042	1.649	0.199095	0.419148	-0.205	1.649	0.199095	0.419148	1387	CREBBP	cg18797283	CREB binding protein
AFF3_P122_F	0.2558	0.979	0.322446	0.626978	0.369	6.105	0.01348	0.0618754	0.3829	6.105	0.01348	0.0618754	3899	AFF3	cg23497683	AF4/FMR2 family, member 3 isoform 2
MBD2_P233_F	0.2208	0.88	0.348202	0.672389	-0.1251	0.027	0.869482	0.954725	0.0246	0.027	0.869482	0.954725	8932	MBD2	cg15090185	methyl-CpG binding domain protein 2 isoform 1
EPHA2_P203_F	-0.225	0.871	0.350679	0.672534	-0.2907	2.252	0.133442	0.308791	-0.2303	2.252	0.133442	0.308791	1969	EPHA2	cg15146752	ephrin receptor EphA2
IL8_P83_F	0.2063	0.852	0.355987	0.678071	0.0548	0.686	0.407528	0.655218	0.1233	0.686	0.407528	0.655218	3576	IL8	cg18302652	interleukin 8 precursor
PPAT_E170_R	-0.2293	0.822	0.364596	0.689776	-0.1565	1.049	0.305738	0.534381	-0.1596	1.049	0.305738	0.534381	5471	PPAT	cg08412991	phosphoribosyl pyrophosphate amidotransferase proprotein
CCL3_E53_R	0.2518	0.794	0.372893	0.700739	0.6019	7.559	0.00597111	0.0341206	0.4465	7.559	0.00597111	0.0341206	6348	CCL3	cg21335375	chemokine (C-C motif) ligand 3
HHIP_P578_R	-0.2346	0.781	0.376835	0.703426	-0.08	0.294	0.587669	0.779845	-0.0863	0.294	0.587669	0.779845	64399	HHIP	cg02524475	hedgehog-interacting protein
PCTK1_E77_R	-0.1928	0.741	0.389341	0.712519	1.43	21.937	2.81749e-06	8.76552e-05	0.702	21.937	2.81749e-06	8.76552e-05	5127	PCTK1	cg12064400	PCTAIRE protein kinase 1
MFAP4_P10_R	0.2005	0.748	0.38711	0.712519	0.1561	1.506	0.21975	0.436384	0.1806	1.506	0.21975	0.436384	4239	MFAP4	cg07727884	microfibrillar-associated protein 4
CARD15_P665_F	-0.2031	0.745	0.388064	0.712519	0.082	0.049	0.824813	0.942643	-0.0329	0.049	0.824813	0.942643	64127	CARD15	cg16771652	NOD2 protein
CARD15_P302_R	-0.1921	0.706	0.400775	0.721013	-0.2656	3.034	0.0815368	0.221653	-0.2439	3.034	0.0815368	0.221653	64127	CARD15	cg23486288	NOD2 protein
SFRP1_P157_F	-0.2008	0.673	0.412008	0.721013	-0.2599	1.529	0.216263	0.434936	-0.1902	1.529	0.216263	0.434936	6422	SFRP1	cg15881237	secreted frizzled-related protein 1
CDK10_P199_R	-0.2113	0.702	0.402112	0.721013	0.4829	1.177	0.277968	0.509073	0.1709	1.177	0.277968	0.509073	8558	CDK10	cg12119029	cyclin-dependent kinase 10 isoform 2
VAMP8_P241_F	-0.2042	0.677	0.410622	0.721013	-0.0622	0.914	0.339055	0.568476	-0.1492	0.914	0.339055	0.568476	8673	VAMP8	cg05486094	vesicle-associated membrane protein 8
MST1R_P87_R	-0.1985	0.69	0.406164	0.721013	-0.1133	0.105	0.74591	0.91203	-0.0504	0.105	0.74591	0.91203	4486	MST1R	cg01709977	macrophage stimulating 1 receptor
DLC1_E276_F	-0.1925	0.673	0.412008	0.721013	0.3397	0.059	0.808084	0.934973	0.0379	0.059	0.808084	0.934973	10395	DLC1	cg24545888	deleted in liver cancer 1 isoform 1
IL6_E168_F	0.1728	0.676	0.410968	0.721013	-0.0796	0.031	0.86024	0.954725	0.024	0.031	0.86024	0.954725	3569	IL6	cg05401786	interleukin 6 (interferon, beta 2)
UBA52_P293_R	-0.1791	0.652	0.419399	0.729389	0.0278	0	1	1	0.0014	0	1	1	7311	UBA52	cg23146959	ubiquitin and ribosomal protein L40 precursor
HRASLS_P353_R	0.2115	0.635	0.425527	0.730967	0.2274	1.221	0.269164	0.499113	0.175	1.221	0.269164	0.499113	57110	HRASLS	cg14777903	HRAS-like suppressor
IL8_E118_R	-0.2042	0.635	0.425527	0.730967	0.2492	0.175	0.675706	0.859989	0.0663	0.175	0.675706	0.859989	3576	IL8	cg01548201	interleukin 8 precursor
PLA2G2A_P528_F	0.1973	0.613	0.43366	0.740396	0.7586	9.334	0.00224941	0.0179953	0.4737	9.334	0.00224941	0.0179953	5320	PLA2G2A	cg09600256	phospholipase A2, group IIA
IGFBP1_P12_R	-0.1854	0.59	0.442419	0.741781	-0.2472	1.24	0.265471	0.496627	-0.1693	1.24	0.265471	0.496627	3484	IGFBP1	cg00110785	insulin-like growth factor binding protein 1 isoform b precursor
TEK_E75_F	0.195	0.602	0.437816	0.741781	-0.2262	0.043	0.835725	0.9457	-0.0324	0.043	0.835725	0.9457	7010	TEK	cg05749772	TEK tyrosine kinase, endothelial
ELK3_P514_F	-0.1739	0.596	0.440108	0.741781	0.1513	0.01	0.920344	0.976123	0.0145	0.01	0.920344	0.976123	2004	ELK3	cg11467837	ELK3 protein
FGF2_P229_F	-0.1709	0.578	0.447097	0.745162	-0.1465	0.372	0.541916	0.748971	-0.0882	0.372	0.541916	0.748971	2247	FGF2	cg03941587	fibroblast growth factor 2
MMP10_E136_R	0.1707	0.488	0.484821	0.747257	0.4195	6.015	0.0141848	0.0640603	0.3848	6.015	0.0141848	0.0640603	4319	MMP10	cg02061229	matrix metalloproteinase 10 preproprotein
MMP9_E88_R	0.1666	0.486	0.485717	0.747257	0.4675	4.953	0.0260454	0.102714	0.339	4.953	0.0260454	0.102714	4318	MMP9	cg05437645	matrix metalloproteinase 9 preproprotein
HLA-DPA1_E35_R	-0.178	0.554	0.456688	0.747257	-0.356	4.587	0.0322154	0.118064	-0.3216	4.587	0.0322154	0.118064	3113	HLA-DPA1	cg09321817	major histocompatibility complex, class II, DP alpha 1 precursor
DDIT3_P1313_R	-0.1863	0.501	0.479061	0.747257	-0.451	3.28	0.0701289	0.200368	-0.2895	3.28	0.0701289	0.200368	1649	DDIT3	cg19520710	DNA-damage-inducible transcript 3
IL10_P85_F	-0.1768	0.566	0.451853	0.747257	-0.3205	2.696	0.1006	0.253767	-0.2448	2.696	0.1006	0.253767	3586	IL10	cg10978799	interleukin 10 precursor
LMO2_E148_F	-0.163	0.494	0.482148	0.747257	-0.2112	1.694	0.193075	0.412678	-0.1958	1.694	0.193075	0.412678	4005	LMO2	cg22902574	LIM domain only 2
MAPK14_P327_R	0.1574	0.494	0.482148	0.747257	0.0634	1.237	0.26605	0.496627	0.1642	1.237	0.26605	0.496627	1432	MAPK14	cg18213931	mitogen-activated protein kinase 14 isoform 3
BMP4_P123_R	0.166	0.523	0.469565	0.747257	0.0561	1.096	0.295146	0.526374	0.1588	1.096	0.295146	0.526374	652	BMP4	cg26240298	bone morphogenetic protein 4 preproprotein
PDGFRA_E125_F	0.1606	0.556	0.455876	0.747257	-0.3437	0.983	0.321459	0.54222	-0.1402	0.983	0.321459	0.54222	5156	PDGFRA	cg20629161	platelet-derived growth factor receptor alpha precursor
ELL_P693_F	-0.1835	0.508	0.476006	0.747257	0.3232	0.671	0.412703	0.655218	0.13	0.671	0.412703	0.655218	8178	ELL	cg09597048	elongation factor RNA polymerase II
IGF1_P933_F	-0.1817	0.538	0.463263	0.747257	0.2902	0.271	0.602662	0.792231	0.0778	0.271	0.602662	0.792231	3479	IGF1	cg20581381	insulin-like growth factor 1 (somatomedin C)
ZNF215_P71_R	0.1664	0.533	0.465348	0.747257	-0.0676	0.184	0.667958	0.85401	0.0641	0.184	0.667958	0.85401	7762	ZNF215	cg17958423	zinc finger protein 215
TES_P182_F	-0.1472	0.493	0.482592	0.747257	0.1019	0.021	0.884779	0.9595	-0.0204	0.021	0.884779	0.9595	26136	TES	cg00626984	testin isoform 1
IHH_P246_R	-0.1567	0.49	0.483927	0.747257	-0.0011	0.001	0.974773	0.992496	-0.0037	0.001	0.974773	0.992496	3549	IHH	cg06266124	Indian hedgehog homolog
SLC22A18_P216_R	-0.1701	0.467	0.494371	0.752303	-0.3551	2.761	0.0965878	0.250413	-0.259	2.761	0.0965878	0.250413	5002	SLC22A18	cg25427871	tumor suppressing subtransferable candidate 5
HS3ST2_P546_F	-0.1525	0.472	0.492069	0.752303	0.2904	0.302	0.582631	0.779845	0.0811	0.302	0.582631	0.779845	9956	HS3ST2	cg23911889	heparan sulfate D-glucosaminyl 3-O-sulfotransferase 2
WRN_E57_F	-0.1514	0.457	0.499029	0.755288	0.1838	0.005	0.943628	0.988401	-0.0106	0.005	0.943628	0.988401	7486	WRN	cg27071045	Werner syndrome protein
C20orf47_P225_R	-0.1496	0.447	0.503763	0.758353	-0.2522	2.548	0.110434	0.268428	-0.2356	2.548	0.110434	0.268428	51614	ERGIC3	cg12630922	serologically defined breast cancer antigen 84 isoform b
CAV1_P169_F	-0.1506	0.422	0.515941	0.772532	0.3679	1.525	0.216864	0.434936	0.189	1.525	0.216864	0.434936	857	CAV1	cg07838272	caveolin 1
GRB10_P496_R	0.1673	0.404	0.525031	0.781961	0.1203	0.396	0.529162	0.743017	0.1007	0.396	0.529162	0.743017	2887	GRB10	cg19392396	growth factor receptor-bound protein 10 isoform c
CSF1R_P73_F	0.139	0.369	0.54355	0.805259	0.2818	1.435	0.23095	0.45221	0.1796	1.435	0.23095	0.45221	1436	CSF1R	cg01875467	colony stimulating factor 1 receptor precursor
GSTM2_P453_R	0.1476	0.355	0.551296	0.812437	-0.1228	0.157	0.691934	0.872709	-0.0614	0.157	0.691934	0.872709	2946	GSTM2	cg11063364	glutathione S-transferase M2
HLA-DPB1_E2_R	-0.1354	0.332	0.564484	0.825779	-0.3549	3.909	0.0480282	0.152817	-0.2971	3.909	0.0480282	0.152817	3115	HLA-DPB1	cg12899649	major histocompatibility complex, class II, DP beta 1 precursor
EXT1_E197_F	0.1319	0.329	0.566249	0.825779	-0.1417	0.029	0.864779	0.954725	0.0258	0.029	0.864779	0.954725	2131	EXT1	cg27085164	exostosin 1
WNT5A_P655_F	-0.1401	0.32	0.571608	0.829275	0.0134	0.028	0.867109	0.954725	-0.0258	0.028	0.867109	0.954725	7474	WNT5A	cg19344602	wingless-type MMTV integration site family, member 5A precursor
GPX1_P194_F	-0.137	0.294	0.587669	0.848181	0.5624	2.733	0.0982945	0.2525	0.2584	2.733	0.0982945	0.2525	2876	GPX1	cg08539067	glutathione peroxidase 1 isoform 1
EPHX1_P1358_R	0.116	0.233	0.629308	0.849131	0.447	3.985	0.0459071	0.149465	0.3033	3.985	0.0459071	0.149465	2052	EPHX1	cg12786690	epoxide hydrolase 1, microsomal (xenobiotic)
WNT5A_E43_F	-0.1166	0.238	0.625654	0.849131	0.4191	1.59	0.207326	0.4309	0.1941	1.59	0.207326	0.4309	7474	WNT5A	cg16891776	wingless-type MMTV integration site family, member 5A precursor
ID1_P880_F	0.1167	0.233	0.629308	0.849131	0.1555	1.011	0.314663	0.534381	0.1552	1.011	0.314663	0.534381	3397	ID1	cg22503909	inhibitor of DNA binding 1 isoform a
PECAM1_P135_F	-0.1088	0.237	0.626381	0.849131	-0.1367	0.635	0.425527	0.655218	-0.1184	0.635	0.425527	0.655218	5175	PECAM1	cg05359956	platelet/endothelial cell adhesion molecule (CD31 antigen)
TRIP6_P1090_F	-0.1209	0.245	0.620618	0.849131	-0.0573	0.54	0.462433	0.682703	-0.1133	0.54	0.462433	0.682703	7205	TRIP6	cg09357642	thyroid hormone receptor interactor 6
IGFBP6_P328_R	-0.1125	0.235	0.627841	0.849131	-0.064	0.461	0.497157	0.71723	-0.1032	0.461	0.497157	0.71723	3489	IGFBP6	cg00122038	insulin-like growth factor binding protein 6
TMEFF2_P210_R	-0.1273	0.251	0.616372	0.849131	-0.1485	0.448	0.503286	0.71898	-0.1053	0.448	0.503286	0.71898	23671	TMEFF2	cg21377961	transmembrane protein with EGF-like and two follistatin-like domains 2
HOXB13_E21_F	0.1199	0.245	0.620618	0.849131	0.1138	0.372	0.541916	0.748971	0.0942	0.372	0.541916	0.748971	10481	HOXB13	cg21160992	homeo box B13
GLI3_P453_R	0.1086	0.236	0.62711	0.849131	-0.198	0.271	0.602662	0.792231	-0.0776	0.271	0.602662	0.792231	2737	GLI3	cg23194824	GLI-Kruppel family member GLI3
NFKB1_P496_F	0.1134	0.283	0.594742	0.849131	-0.2133	0.166	0.683691	0.866215	-0.0571	0.166	0.683691	0.866215	4790	NFKB1	cg24413435	nuclear factor kappa-B, subunit 1
CCR5_P630_R	0.1228	0.265	0.606706	0.849131	0.0121	0.1	0.75183	0.915271	0.0482	0.1	0.75183	0.915271	1234	CCR5	cg21689024	chemokine (C-C motif) receptor 5
PDGFB_P719_F	0.1257	0.286	0.592795	0.849131	-0.1365	0.089	0.765452	0.915926	0.0459	0.089	0.765452	0.915926	5155	PDGFB	cg10554007	platelet-derived growth factor beta isoform 1, preproprotein
PTHLH_P15_R	-0.13088	0.276	0.599335	0.849131	-0.0015	0.093	0.760397	0.915926	-0.0478	0.093	0.760397	0.915926	5744	PTHLH	cg05045983	parathyroid hormone-like hormone isoform 2 preproprotein
TP73_E155_F	-0.1058	0.231	0.630783	0.849131	-0.0412	0.002	0.964329	0.992496	-0.0071	0.002	0.964329	0.992496	7161	TP73	cg05300134	tumor protein p73
OGG1_E400_F	-0.1187	0.226	0.634506	0.850056	-0.2458	0.846	0.357686	0.596144	-0.1439	0.846	0.357686	0.596144	4968	OGG1	cg10816847	8-oxoguanine DNA glycosylase isoform 2d
GFI1_P208_R	-0.1184	0.216	0.642105	0.85614	-0.2061	1.017	0.313232	0.534381	-0.158	1.017	0.313232	0.534381	2672	GFI1	cg20125091	growth factor independent 1
SPI1_E205_F	-0.1009	0.205	0.650715	0.859435	-0.2703	2.712	0.0995961	0.253517	-0.2461	2.712	0.0995961	0.253517	6688	SPI1	cg07675031	spleen focus forming virus (SFFV) proviral integration oncogene spi1
SLC22A3_P634_F	-0.116	0.207	0.649129	0.859435	-0.255	1.015	0.313708	0.534381	-0.159	1.015	0.313708	0.534381	6581	SLC22A3	cg13523841	solute carrier family 22 member 3
SHH_E328_F	-0.1027	0.193	0.660431	0.864116	0.2472	0.37	0.543004	0.748971	0.0927	0.37	0.543004	0.748971	6469	SHH	cg02023134	sonic hedgehog preproprotein
THY1_P20_R	0.1127	0.195	0.658787	0.864116	-0.1065	0.03	0.86249	0.954725	-0.0274	0.03	0.86249	0.954725	7070	THY1	cg11980653	Thy-1 cell surface antigen
ETS2_P835_F	0.1067	0.178	0.673098	0.868513	-0.2601	0.297	0.585769	0.779845	-0.0853	0.297	0.585769	0.779845	2114	ETS2	cg06712947	v-ets erythroblastosis virus E26 oncogene homolog 2
TRIP6_P1274_R	-0.105	0.18	0.671373	0.868513	0.0362	0.127	0.721563	0.890034	-0.0555	0.127	0.721563	0.890034	7205	TRIP6	cg06647679	thyroid hormone receptor interactor 6
CD82_P557_R	0.1014	0.184	0.667958	0.868513	-0.1022	0.086	0.769325	0.916643	-0.0432	0.086	0.769325	0.916643	3732	CD82	cg24700286	CD82 antigen isoform 1
CDH13_P88_F	-0.0853	0.156	0.692866	0.88992	0.0052	0.015	0.902523	0.968224	-0.0171	0.015	0.902523	0.968224	1012	CDH13	cg08977371	cadherin 13 preproprotein
NFKB2_P709_R	-0.087	0.151	0.697582	0.890264	-0.3139	2.489	0.114645	0.272211	-0.2328	2.489	0.114645	0.272211	4791	NFKB2	cg23201134	nuclear factor of kappa light polypeptide gene enhancer in B-cells 2 (p49/p100)
FGFR2_P460_R	0.0865	0.149	0.699493	0.890264	0.2257	1.994	0.157923	0.351172	0.206	1.994	0.157923	0.351172	2263	FGFR2	cg04640037	fibroblast growth factor receptor 2 isoform 12 precursor
MET_E333_F	-0.094	0.14	0.708281	0.894584	-0.5844	3.508	0.0610731	0.180005	-0.298	3.508	0.0610731	0.180005	4233	MET	cg24548568	met proto-oncogene precursor
MFAP4_P197_F	-0.0825	0.139	0.709277	0.894584	0.0669	0	1	1	-0.0023	0	1	1	4239	MFAP4	cg10351914	microfibrillar-associated protein 4
DAPK1_E46_R	-0.0844	0.128	0.720515	0.895276	0.3173	1.107	0.292735	0.525422	0.1599	1.107	0.292735	0.525422	1612	DAPK1	cg22630196	death-associated protein kinase 1
GPATC3_P410_R	0.089	0.126	0.722616	0.895276	-0.0014	0.564	0.452653	0.678965	0.1179	0.564	0.452653	0.678965	63906	GPATC3	cg18665535	G patch domain containing 3
MCC_E23_R	0.0851	0.126	0.722616	0.895276	-0.0011	0.066	0.797252	0.933662	0.0395	0.066	0.797252	0.933662	4163	MCC	cg10599443	mutated in colorectal cancers
ITGB1_P451_F	-0.0823	0.135	0.713303	0.895276	0.121	0.007	0.933322	0.982444	0.0129	0.007	0.933322	0.982444	3688	ITGB1	cg03222924	integrin beta 1 isoform 1C-1 precursor
DLC1_P88_R	0.0897	0.119	0.730122	0.900591	0.1764	1.57	0.210207	0.432779	0.198	1.57	0.210207	0.432779	10395	DLC1	cg08768218	deleted in liver cancer 1 isoform 1
MTA1_P478_F	-0.0749	0.114	0.735635	0.903412	-0.0239	0.497	0.480821	0.704869	-0.105	0.497	0.480821	0.704869	9112	MTA1	cg21902921	metastasis associated protein
CYP1B1_E83_R	0.0746	0.111	0.739009	0.903591	0.3565	1.993	0.158028	0.351172	0.2097	1.993	0.158028	0.351172	1545	CYP1B1	cg09991178	cytochrome P450, family 1, subfamily B, polypeptide 1
HPN_P823_F	-0.0897	0.105	0.74591	0.908064	-0.795	11.526	0.000686295	0.00800678	-0.5376	11.526	0.000686295	0.00800678	3249	HPN	cg00566101	hepsin (transmembrane protease, serine 1)
EPHB4_P313_R	-0.0699	0.097	0.75546	0.911762	0.056	0.017	0.896263	0.965206	0.0195	0.017	0.896263	0.965206	2050	EPHB4	cg22614265	ephrin receptor EphB4 precursor
EPHA8_P256_F	-0.0733	0.099	0.753033	0.911762	0.30259	0	1	1	0.00012785	0	1	1	2046	EPHA8	cg06991945	EPH receptor A8 isoform 1 precursor
KCNQ1_E349_R	0.0662	0.087	0.768026	0.92295	-0.0091	0.081	0.775947	0.920615	0.0425	0.081	0.775947	0.920615	3784	KCNQ1	cg19576908	potassium voltage-gated channel, KQT-like subfamily, member 1 isoform 3
TNFRSF10B_E198_R	0.0729	0.083	0.773272	0.925283	0.1224	0.339	0.560407	0.765434	0.0917	0.339	0.560407	0.765434	8795	TNFRSF10B	cg07508317	tumor necrosis factor receptor superfamily, member 10b isoform 2 precursor
NOS2A_P288_R	0.0657	0.07	0.791337	0.936639	0.3609	1.374	0.241126	0.465622	0.178	1.374	0.241126	0.465622	4843	NOS2A	cg00297776	nitric oxide synthase 2A isoform 1
TFAP2C_E260_F	-0.0645	0.073	0.787018	0.936639	0.1511	0.393	0.530727	0.743017	0.0922	0.393	0.530727	0.743017	7022	TFAP2C	cg13061291	transcription factor AP-2 gamma
IGFBP1_E48_R	0.0607	0.069	0.792798	0.936639	1.0491	0	1	1	0.00088285	0	1	1	3484	IGFBP1	cg20666158	insulin-like growth factor binding protein 1 isoform b precursor
SLC5A8_P38_R	-0.0635	0.061	0.804922	0.946967	0.5757	4.625	0.0315093	0.118064	0.3369	4.625	0.0315093	0.118064	160728	SLC5A8	cg13433302	solute carrier family 5 (iodide transporter), member 8
F2R_P839_F	0.057	0.058	0.809685	0.948423	-0.0733	0.077	0.781405	0.923179	0.0419	0.077	0.781405	0.923179	2149	F2R	cg03231644	coagulation factor II receptor precursor
SLC5A5_E60_F	0.0539	0.056	0.812934	0.948423	-0.042	0.042	0.83762	0.9457	0.0297	0.042	0.83762	0.9457	6528	SLC5A5	cg04997686	solute carrier family 5 (sodium iodide symporter), member 5
OPCML_E219_R	-0.0541	0.052	0.819619	0.952254	-0.04	0.012	0.912771	0.971771	0.0165	0.012	0.912771	0.971771	4978	OPCML	cg19151121	opioid binding protein/cell adhesion molecule-like isoform a preproprotein
PITX2_E24_R	0.0452	0.041	0.839538	0.955572	0.1373	1.282	0.257528	0.491591	0.1534	1.282	0.257528	0.491591	5308	PITX2	cg10692923	paired-like homeodomain transcription factor 2 isoform c
SPI1_P48_F	-0.0523	0.048	0.826581	0.955572	-0.2113	0.637	0.424799	0.655218	-0.1214	0.637	0.424799	0.655218	6688	SPI1	cg03565868	spleen focus forming virus (SFFV) proviral integration oncogene spi1
STK11_P295_R	-0.0497	0.045	0.832004	0.955572	0.2122	0.401	0.526573	0.743017	0.0962	0.401	0.526573	0.743017	6794	STK11	cg12871083	serine/threonine protein kinase 11
LMO2_P794_R	0.0509	0.041	0.839538	0.955572	-0.0252	0.013	0.909224	0.97169	0.0174	0.013	0.909224	0.97169	4005	LMO2	cg02028355	LIM domain only 2
NTRK2_P395_R	-0.0488	0.042	0.83762	0.955572	0.0576	0	1	1	0.0029	0	1	1	4915	NTRK2	cg07764593	neurotrophic tyrosine kinase, receptor, type 2 isoform e precursor
GJB2_P791_R	0.0437	0.038	0.845443	0.958397	-0.0715	0.061	0.804922	0.934973	-0.0369	0.061	0.804922	0.934973	2706	GJB2	cg20193013	gap junction protein, beta 2, 26kDa (connexin 26)
EGR4_P479_F	-0.0421	0.034	0.853707	0.959992	0.3162	0.73	0.392883	0.639577	0.129	0.73	0.392883	0.639577	1961	EGR4	cg21111868	early growth response 4
IRF7_E236_R	0.0413	0.034	0.853707	0.959992	-0.0212	0.023	0.879457	0.9595	0.0225	0.023	0.879457	0.9595	3665	IRF7	cg11519262	interferon regulatory factor 7 isoform b
BCL6_P248_R	-0.0371	0.027	0.869482	0.97382	1.4345	1.521	0.217468	0.434936	0.18339	1.521	0.217468	0.434936	604	BCL6	cg20717875	B-cell lymphoma 6 protein
DUSP4_E61_F	-0.0331	0.022	0.882087	0.974551	0.2933	1.125	0.288844	0.521783	0.1576	1.125	0.288844	0.521783	1846	DUSP4	cg13071058	dual specificity phosphatase 4 isoform 1
SEPT9_P374_F	-0.0354	0.02	0.887537	0.974551	-0.2608	1.02	0.312519	0.534381	-0.1573	1.02	0.312519	0.534381	10801	2009-09-09	cg11617283	septin 9
SEMA3B_E96_F	-0.0334	0.022	0.882087	0.974551	-0.2148	0.305	0.580765	0.779845	-0.0821	0.305	0.580765	0.779845	7869	SEMA3B	cg25047248	semaphorin 3B isoform 1 precursor
GRB7_E71_R	0.0349	0.02	0.887537	0.974551	-0.1544	0.252	0.61567	0.801803	-0.0776	0.252	0.61567	0.801803	2886	GRB7	cg23836594	growth factor receptor-bound protein 7
SYK_P584_F	-0.0356	0.024	0.876885	0.974551	0.0039	0.039	0.843449	0.948456	-0.0298	0.039	0.843449	0.948456	6850	SYK	cg06713470	spleen tyrosine kinase
EMR3_E61_F	-0.0315	0.016	0.899343	0.975413	-0.2285	0.666	0.41445	0.655218	-0.1264	0.666	0.41445	0.655218	84658	EMR3	cg15552238	egf-like module-containing mucin-like receptor 3 isoform b
PADI4_E24_F	-0.0323	0.015	0.902523	0.975413	-0.2428	0.637	0.424799	0.655218	-0.1266	0.637	0.424799	0.655218	23569	PADI4	cg18333690	peptidyl arginine deiminase, type IV
CYP1B1_P212_F	-0.0261	0.013	0.909224	0.975413	0.1186	0.599	0.43896	0.667273	0.1164	0.599	0.43896	0.667273	1545	CYP1B1	cg07057636	cytochrome P450, family 1, subfamily B, polypeptide 1
TIAM1_P188_R	0.0316	0.014	0.905813	0.975413	-0.0047	0.007	0.933322	0.982444	-0.0133	0.007	0.933322	0.982444	7074	TIAM1	cg02217293	T-cell lymphoma invasion and metastasis 1
TJP2_P518_F	-0.0334	0.018	0.893273	0.975413	0.054	0.004	0.949571	0.988401	0.0094	0.004	0.949571	0.988401	9414	TJP2	cg16782205	tight junction protein 2 (zona occludens 2) isoform 1
GRB7_P160_R	-0.0293	0.015	0.902523	0.975413	-0.0561	0.001	0.974773	0.992496	0.0049	0.001	0.974773	0.992496	2886	GRB7	cg08284496	growth factor receptor-bound protein 7
PLSCR3_P751_R	-0.012	0.002	0.964329	0.981786	0.3642	1.471	0.225188	0.444033	0.1858	1.471	0.225188	0.444033	57048	PLSCR3	cg26114392	phospholipid scramblase 3
RYK_P493_F	0.0227	0.009	0.924419	0.981786	0.3239	1.279	0.258085	0.491591	0.1693	1.279	0.258085	0.491591	6259	RYK	cg04318393	similar to RYK receptor-like tyrosine kinase isoform 2
HLA-DRA_P132_R	0.007	0.001	0.974773	0.981786	-0.3229	1.021	0.312282	0.534381	-0.1512	1.021	0.312282	0.534381	3122	HLA-DRA	cg18576604	major histocompatibility complex, class II, DR alpha precursor
KRT13_P676_F	0.0134	0.003	0.95632	0.981786	0.2203	1.01	0.314903	0.534381	0.1581	1.01	0.314903	0.534381	3860	KRT13	cg24851986	keratin 13 isoform b
PECAM1_E32_R	0.0056	0.001	0.974773	0.981786	-0.2415	0.738	0.390302	0.639091	-0.1327	0.738	0.390302	0.639091	5175	PECAM1	cg12476586	platelet/endothelial cell adhesion molecule (CD31 antigen)
PSCA_E359_F	0.0117	0.002	0.964329	0.981786	-0.2296	0.594	0.440876	0.667273	-0.1232	0.594	0.440876	0.667273	8000	PSCA	cg20546389	prostate stem cell antigen
MMP14_P208_R	-0.0077	0.001	0.974773	0.981786	-0.1685	0.459	0.498092	0.71723	-0.1053	0.459	0.498092	0.71723	4323	MMP14	cg01508380	matrix metalloproteinase 14 preproprotein
TMEFF1_P626_R	-0.0075	0.001	0.974773	0.981786	-0.3312	0.439	0.507606	0.72147	-0.1025	0.439	0.507606	0.72147	8577	TMEFF1	cg20925051	transmembrane protein with EGF-like and two follistatin-like domains 1
MMP14_P13_F	0.0086	0.001	0.974773	0.981786	-0.1857	0.35	0.554113	0.760547	-0.0913	0.35	0.554113	0.760547	4323	MMP14	cg09208010	matrix metalloproteinase 14 preproprotein
TAL1_P817_F	0.0142	0.004	0.949571	0.981786	-0.2939	0.24	0.624206	0.809156	-0.0746	0.24	0.624206	0.809156	6886	TAL1	cg26891410	T-cell acute lymphocytic leukemia 1
IL16_P226_F	0.0142	0.003	0.95632	0.981786	-0.0955	0.186	0.666267	0.85401	-0.0681	0.186	0.666267	0.85401	3603	IL16	cg12993983	interleukin 16 isoform 1 precursor
THPO_E483_F	0.0187	0.005	0.943628	0.981786	-0.1217	0.133	0.715342	0.890034	-0.0573	0.133	0.715342	0.890034	7066	THPO	cg08997821	thrombopoietin isoform 2 precursor
COL18A1_P365_R	0.016	0.004	0.949571	0.981786	-0.1569	0.106	0.744745	0.91203	-0.0507	0.106	0.744745	0.91203	80781	COL18A1	cg26239725	alpha 1 type XVIII collagen isoform 3 precursor
JAK3_P1075_R	-0.0237	0.008	0.92873	0.981786	-0.0133	0.05	0.823063	0.942643	-0.0347	0.05	0.823063	0.942643	3718	JAK3	cg05244380	Janus kinase 3
MT1A_E13_R	0.0134	0.004	0.949571	0.981786	-0.0257	0.021	0.884779	0.9595	0.0202	0.021	0.884779	0.9595	4489	MT1A	cg26001009	metallothionein 1A
MATK_P190_R	-0.0052	0.001	0.974773	0.981786	-0.0276	0.003	0.95632	0.991739	0.008	0.003	0.95632	0.991739	4145	MATK	cg21380287	megakaryocyte-associated tyrosine kinase isoform a
HGF_E102_R	0.0206	0.007	0.933322	0.981786	1.4297	0.001	0.974773	0.992496	0.005208	0.001	0.974773	0.992496	3082	HGF	cg08988647	hepatocyte growth factor isoform 4 precursor
OSM_P188_F	0.0041	0	1	1	0.02	0.232	0.630045	0.812961	0.0738	0.232	0.630045	0.812961	5008	OSM	cg04546763	oncostatin M precursor
SOX17_P287_R	0.0006359	0	1	1	-0.1759	0.07	0.791337	0.930984	-0.0381	0.07	0.791337	0.930984	64321	SOX17	cg19346665	SRY-box 17
