# Supplementary material for: The Relationship of DNA Methylation with Age, Gender and Genotype in Twins and Healthy Controls
Source: PLoS One. 2009 Aug 26;4(8):e6767. doi: 10.1371/journal.pone.0006767 (PMC2747671; doi:10.1371/journal.pone.0006767)
Supplement: Table S4 — Full mapping results (0.06 MB XLS) [file pone.0006767.s004.xls]

## Sheet: table5_means_long
Probe_ID	CHR probe	SNP	CHR	BP	AA	sd	AB	sd	BB	sd	difference AA-BB	Beta	SE	R2	T	P	FDR_BH	Overall
ALOX12_P223_R	17	rs434473	17	6845658	0.686193	0.0927769	0.522696	0.12006	0.276541	0.111842	0.409652	-0.2042	0.0183	0.5832	-11.16	1.331e-18	5.86e-13	3.00032e-10
ALOX12_P223_R	17	rs1126667	17	6843484	0.291009	0.126636	0.521849	0.121097	0.686193	0.0927769	0.395184	-0.1976	0.01856	0.5602	-10.65	1.495e-17	3.291e-12	1.68499e-09
ALOX12_E85_R	17	rs434473	17	6845658	0.648921	0.133459	0.493216	0.141885	0.302838	0.150586	0.346084	-0.1728	0.02265	0.3954	-7.629	2.49e-11	1.096e-05	0.00561152
ALOX12_E85_R	17	rs1126667	17	6843484	0.314524	0.155609	0.492366	0.143163	0.648921	0.133459	0.334397	-0.1672	0.02265	0.3798	-7.383	7.864e-11	1.731e-05	0.00886272
ALOX12_P223_R	17	rs311734	17	6818123	0.263146	0.124618	0.449346	0.145257	0.591053	0.144156	0.327908	-0.156	0.0224	0.3527	-6.963	5.485e-10	6.036e-05	0.123648
ALOX12_P223_R	17	rs2292350	17	6842396	0.692823	0.0813214	0.55847	0.112206	0.3724	0.180319	0.320423	0.1678	0.02221	0.3907	7.554	3.533e-11	5.184e-06	0.0079616
ALOX12_E85_R	17	rs311734	17	6818123	0.273869	0.120147	0.426243	0.142821	0.568342	0.165895	0.294473	-0.1454	0.0241	0.2902	-6.032	3.622e-08	0.003986	1
ALOX12_E85_R	17	rs2292350	17	6842396	0.658782	0.136289	0.530939	0.142364	0.369057	0.172449	0.289725	0.1499	0.02455	0.2951	6.104	2.645e-08	0.003881	1
ALOX12_E85_R	17	rs6502997	17	6828482	0.304362	0.118638	0.454656	0.155768	0.588251	0.165257	0.283889	-0.1397	0.02397	0.2761	-5.827	8.887e-08	0.007824	1
MET_E333_F	7	rs38840	7	116100222	0.835375	0.00426527	0.701322	0.0615852	0.575022	0.0840074	0.260353	0.1273	0.01485	0.452	8.567	2.948e-13	1.298e-07	6.64576e-05
MET_E333_F	7	rs1002399	7	116072951	0.835375	0.00426527	0.693879	0.0671799	0.575169	0.0855647	0.260206	0.1214	0.01523	0.4168	7.976	4.872e-12	1.072e-06	0.000548864
TSC2_E140_F	16	rs3134269	8	104491078	0.555418	0	0.729588	0.065546	0.795269	0.048483	0.239851	-0.07709	0.01278	0.2903	-6.034	3.59e-08	0.0158	1
KRAS_E82_F	12	rs9763161	5	260618	0.343819	0.059913	0.498769	0.0697532	0.564649	0.0780966	0.220829	-0.0879	0.01465	0.2881	-6.001	4.15e-08	0.003045	1
IFNG_E293_F	12	rs17553805	5	168163498	0.631654	0	0.780546	0.0596086	0.8354	0.0374736	0.203746	-0.06474	0.01043	0.302	-6.205	1.691e-08	0.007442	1
HPN_P823_F	19	rs2009579	20	37314896	0.510498	0.122569	0.634328	0.0927711	0.688429	0.0939107	0.177931	-0.08341	0.01439	0.274	-5.796	1.014e-07	0.02232	1
SLC22A3_P634_F	6	rs539298	6	160690350	0.654403	0.0768686	0.600967	0.0825532	0.481459	0.0960797	0.172944	-0.08412	0.0129	0.3233	-6.52	4.127e-09	0.001817	0.930304
KRAS_E82_F	12	rs1566753	6	54741994	0.605651	0.0670429	0.517609	0.064534	0.433476	0.0743079	0.172175	-0.08653	0.009924	0.4607	-8.719	1.436e-13	3.161e-08	3.23635e-05
KRAS_E82_F	12	rs4516942	6	54743376	0.605651	0.0670429	0.517609	0.064534	0.433476	0.0743079	0.172175	-0.08653	0.009924	0.4607	-8.719	1.436e-13	3.161e-08	3.23635e-05
EVI2A_E420_F	17	rs2953013	17	26520469	0.4907	0.0787554	0.560533	0.0753379	0.659656	0.054384	0.168956	0.08043	0.01123	0.3656	7.162	2.198e-10	2.781e-05	0.0495462
EVI2A_E420_F	17	rs12603838	17	26432185	0.491373	0.0797016	0.557969	0.0758731	0.659656	0.054384	0.168283	0.07929	0.01139	0.3524	6.96	5.572e-10	3.066e-05	0.0156979
EVI2A_E420_F	17	rs4559963	17	26462684	0.491373	0.0797016	0.557969	0.0758731	0.659656	0.054384	0.168283	0.07929	0.01139	0.3524	6.96	5.572e-10	3.066e-05	0.125594
EVI2A_E420_F	17	rs7226006	17	26674782	0.491373	0.0797016	0.557969	0.0758731	0.659656	0.054384	0.168283	0.07929	0.01139	0.3524	6.96	5.572e-10	3.066e-05	0.125594
EVI2A_E420_F	17	rs984125	17	26571380	0.659656	0.054384	0.557969	0.0758731	0.491373	0.0797016	0.168283	0.07929	0.01139	0.3524	6.96	5.572e-10	3.066e-05	0.125594
KRAS_E82_F	12	rs6916818	6	54765636	0.437302	0.0733795	0.523646	0.0668839	0.60453	0.0664519	0.167229	-0.08312	0.009783	0.4479	-8.497	4.123e-13	6.05e-08	9.2928e-05
EVI2A_E420_F	17	rs2905803	17	26544182	0.659656	0.054384	0.554582	0.0777978	0.49301	0.0800159	0.166646	0.07731	0.01162	0.3322	6.654	2.253e-09	0.0001102	0.507802
NPR2_P618_F	9	rs13284995	9	35832854	0.367414	0.103322	0.270037	0.0996178	0.200906	0.0797205	0.166507	0.08153	0.0138	0.2816	5.907	6.267e-08	0.01774	1
CTSD_P726_F	11	rs3740627	11	1710976	0.882732	0.0210897	0.796192	0.0646833	0.717347	0.0476393	0.165386	0.08001	0.01089	0.3776	7.348	9.238e-11	4.067e-05	0.020823
MET_E333_F	7	rs437	7	116084132	0.575556	0.0788291	0.66294	0.0977528	0.740489	0.0673617	0.164933	0.08447	0.01397	0.2912	6.047	3.395e-08	0.004982	1
NPR2_P618_F	9	rs10758322	9	35766190	0.378215	0.0897556	0.259338	0.104708	0.215927	0.0823573	0.162288	0.07616	0.01302	0.2777	5.849	8.061e-08	0.01774	1
EVI2A_E420_F	17	rs2051507	17	26724227	0.490486	0.0801674	0.556409	0.0780215	0.649619	0.0634102	0.159133	0.07621	0.01159	0.3294	6.574	3.351e-09	0.0001341	0.7552
KRAS_E82_F	12	rs1503133	6	54817870	0.598789	0.0724141	0.519812	0.0691002	0.44502	0.0763346	0.153769	-0.07731	0.01038	0.384	-7.449	5.777e-11	6.358e-06	0.0130202
HPN_P823_F	19	rs2278996	19	40222621	0.66566	0.0992971	0.512523	0.0956327	0	0	0.153137	-0.1531	0.02494	0.2975	-6.14	2.257e-08	0.009933	1
KRAS_E82_F	12	rs10948847	6	54712476	0.434115	0.064671	0.51368	0.0680845	0.587157	0.0837086	0.153042	-0.07551	0.01177	0.3185	-6.413	6.907e-09	0.0006081	0.311347
EVI2A_E420_F	17	rs11080150	17	26653452	0.490257	0.0791184	0.559057	0.0751759	0.641675	0.0831536	0.151418	0.07398	0.01163	0.3126	6.361	8.421e-09	0.0002851	0.145971
EVI2A_E420_F	17	rs9892839	17	26643116	0.490257	0.0791184	0.559057	0.0751759	0.641675	0.0831536	0.151418	0.07398	0.01163	0.3126	6.361	8.421e-09	0.0002851	1
EVI2A_E420_F	17	rs1048317	17	26728128	0.628666	0.067992	0.548757	0.0733984	0.477289	0.0760885	0.151377	0.07533	0.009869	0.3957	7.633	2.441e-11	1.074e-05	0.00549888
MMP14_P208_R	14	rs10082970	12	130644135	0.588826	0.0221445	0.516219	0.0561445	0.440455	0.0619523	0.148371	0.07512	0.01195	0.3076	6.288	1.166e-08	0.005134	1
EVI2A_E420_F	17	rs2525574	17	26730073	0.628666	0.067992	0.544834	0.0741078	0.481328	0.0790147	0.147338	0.07281	0.01008	0.3696	7.223	1.65e-10	2.781e-05	0.0371917
EVI2A_E420_F	17	rs2525570	17	26705371	0.627826	0.0666687	0.535998	0.0730134	0.482415	0.0813945	0.145411	0.07164	0.01005	0.3636	7.131	2.527e-10	2.781e-05	0.0569344
MMP14_P208_R	14	rs1029398	13	31697288	0.436505	0.0650518	0.495144	0.0561662	0.580949	0.0364861	0.144444	0.06428	0.01112	0.273	5.781	1.083e-07	0.02384	1
TMPRSS4_P552_F	11	rs652030	11	117447335	0.813885	0.0447181	0.900385	0.0256266	0.957769	0.00924601	0.143884	0.08138	0.007457	0.5723	10.91	4.253e-18	1.872e-12	9.58464e-10
MLF1_P97_F	3	rs9569177	13	54495814	0.118363	0.0503835	0.188041	0.0536953	0.261028	0.212678	0.142664	0.07024	0.01216	0.2728	5.779	1.094e-07	0.04816	1
TMPRSS4_P552_F	11	rs585533	11	117433171	0.957769	0.00924601	0.887571	0.0575298	0.816573	0.0368305	0.141195	0.07086	0.008417	0.4433	8.419	5.969e-13	1.314e-07	0.000134554
TMPRSS4_P552_F	11	rs1786185	11	117427353	0.818185	0.0361753	0.871438	0.0633411	0.957769	0.00924601	0.139584	0.05841	0.009285	0.3078	6.291	1.152e-08	0.001268	1
TIE1_E66_R	1	rs2052059	19	3747849	0.293379	0.0811377	0.34705	0.0789942	0.427998	0.0839058	0.134619	-0.07108	0.01229	0.2731	-5.783	1.073e-07	0.04723	1
PCTK1_E77_R	X	rs3881953	1/Y	200794644	0.706461	0.057227	0.610451	0.0634677	0	0	0.134053	0.09601	0.01315	0.3881	7.299	1.501e-10	2.203e-05	0.033833
EVI2A_E420_F	17	rs4258685	17	26758833	0.617421	0.0667591	0.528209	0.0856358	0.483383	0.0738722	0.134038	0.06687	0.01018	0.3265	6.569	3.308e-09	0.0001341	0.745472
DIRAS3_E55_R	1	rs17318470	15	66403664	0.789625	0	0.90353	0.0143108	0.917886	0.0147724	0.128261	-0.02406	0.004092	0.2797	-5.879	7.076e-08	0.03115	1
LMTK2_P1034_F	7	rs12443738	16	13309840	0.666827	0.0598041	0.75161	0.0412742	0.791654	0.0395978	0.124828	-0.04989	0.008377	0.285	-5.956	5.064e-08	0.02229	1
MAF_E77_R	16	rs12583706	13	112785714	0.205935	0.038786	0.110571	0.0445352	0.0819999	0.0296386	0.123935	0.04327	0.007066	0.2965	6.124	2.419e-08	0.01065	1
FAS_P322_R	10	rs10880967	12	45098290	0.277221	0.0728359	0.183873	0.0574267	0.156147	0.0530281	0.121074	0.05151	0.008836	0.2763	5.83	8.766e-08	0.0151	1
FAS_P322_R	10	rs9971879	12	45093040	0.277221	0.0728359	0.183873	0.0574267	0.156147	0.0530281	0.121074	0.05151	0.008836	0.2763	5.83	8.766e-08	0.0151	1
FAS_P322_R	10	rs4768118	12	45071011	0.271573	0.0726481	0.18362	0.0575075	0.155889	0.0534563	0.115683	0.05033	0.008689	0.2738	5.793	1.029e-07	0.0151	1
BCL2L2_P280_F	14	rs1915613	10	66153222	0.282832	0.0169508	0.229983	0.062639	0.174586	0.0433863	0.108246	0.0549	0.009338	0.2798	5.88	7.058e-08	0.03107	1
TEK_P479_R	9	rs10967716	9	27097349	0.961622	0.0191787	0.912052	0.017856	0.855169	0.0260379	0.106453	0.05565	0.004379	0.6447	12.71	1.053e-21	4.635e-16	2.37312e-13
CD34_P339_R	1	rs9875783	3	82560495	0.277133	0.0407758	0.328474	0.0465752	0.383138	0.0559915	0.106005	-0.0539	0.009021	0.2863	-5.975	4.661e-08	0.02052	1
PRKCDBP_P352_R	11	rs1588873	3	174270514	0.140309	0.0397308	0.173861	0.0366828	0.245174	0.0347596	0.104865	0.04066	0.007002	0.2747	5.807	9.694e-08	0.04267	1
FGFR2_P460_R	10	rs5995002	22	33521923	0.236065	0.0521835	0.282395	0.0494984	0.340901	0.0783534	0.104836	0.05037	0.008536	0.2812	5.9	6.454e-08	0.02841	1
TEK_P479_R	9	rs10738763	9	27105768	0.85713	0.0277869	0.912052	0.0180119	0.961622	0.0191787	0.104492	0.05399	0.004684	0.5988	11.53	2.411e-19	3.538e-14	1.81146e-11
TEK_P479_R	9	rs620090	9	27064233	0.859907	0.026983	0.90376	0.0330483	0.961622	0.0191787	0.101715	0.04622	0.005475	0.4446	8.441	5.366e-13	5.905e-08	0.000120934
TMPRSS4_P552_F	11	rs4938471	11	117430196	0.806878	0.0490101	0.86827	0.0477203	0.907307	0.0481552	0.100429	0.05475	0.008122	0.3405	6.741	1.581e-09	0.000232	0.356301
MME_P388_F	3	rs3811909	5	121775133	0.194256	0.0436324	0.156854	0.0423013	0.0974082	0.0606908	0.0968473	-0.0434	0.007495	0.2737	-5.791	1.038e-07	0.0457	1
TEK_P479_R	9	rs615375	9	27102311	0.855948	0.0258542	0.910221	0.022408	0.952504	0.0240363	0.0965563	0.05178	0.004473	0.601	11.58	1.896e-19	3.538e-14	4.27264e-11
PCTK1_E77_R	X	rs12734338	1	200736346	0.610451	0.0634677	0.705855	0.0541706	0	0	0.0954037	0.0954	0.0125	0.3985	7.635	2.562e-11	1.128e-05	0.00577536
TDG_E129_F	12	rs326387	12	124371101	0.788794	0.0242487	0.851111	0.0273086	0.883278	0.0248181	0.0944843	-0.04222	0.004313	0.5184	-9.788	8.77e-16	3.861e-10	1.97683e-07
PTPRF_E178_R	1	rs10975884	9	6892538	0.0382315	0.0147704	0.0851785	0.032716	0.132675	0.045576	0.0944439	-0.04731	0.006005	0.4109	-7.878	7.718e-12	8.494e-07	0.000434893
PCTK1_E77_R	X	rs12743401	1/Y	200743271	0.610451	0.0634677	0.704653	0.05579	0	0	0.0942025	0.0942	0.01273	0.3861	7.398	8.153e-11	1.794e-05	0.00918528
PTPRF_E178_R	1	rs6477122	9	6885374	0.0439833	0.0204265	0.0913785	0.0334122	0.137423	0.0460759	0.0934397	-0.04662	0.005673	0.4314	-8.217	1.554e-12	2.281e-07	0.00035031
PTPRF_E178_R	1	rs12375929	9	6892404	0.143337	0.0430247	0.0945407	0.0300731	0.0505482	0.0335683	0.0927889	-0.04645	0.005181	0.4746	-8.966	4.41e-14	9.707e-09	4.96998e-06
PTPRF_E178_R	1	rs7033444	9	6891428	0.143337	0.0430247	0.0945407	0.0300731	0.0505482	0.0335683	0.0927889	-0.04645	0.005181	0.4746	-8.966	4.41e-14	9.707e-09	9.93792e-06
SPP1_E140_R	4	rs7144243	14	67144185	0.0525336	0.0272606	0.0762936	0.0335698	0.144303	0.0257025	0.0917693	0.03265	0.005515	0.2826	5.921	5.901e-08	0.02598	1
THY1_P20_R	11	rs1010161	17	69849246	0.210738	0.0194977	0.268174	0.0330272	0.299897	0.0391041	0.0891587	-0.03805	0.006477	0.2795	-5.875	7.192e-08	0.03166	1
PTPRF_E178_R	1	rs2381512	9	6872169	0.0382315	0.0147704	0.0844457	0.0315269	0.127128	0.0471651	0.0888968	-0.04386	0.005998	0.3753	-7.312	1.095e-10	9.642e-06	0.0246835
GNMT_P197_F	6	rs535315	20	723842	0.266468	0.0496436	0.209119	0.0300038	0.180217	0.0328643	0.0862515	0.03582	0.005835	0.2975	6.14	2.255e-08	0.009927	1
TUBB3_P721_R	16	rs928870	21	26991908	0.0689263	0.0266227	0.0889319	0.0267666	0.152499	0.0167947	0.0835725	0.02907	0.004969	0.2801	5.852	8.176e-08	0.03599	1
PTPRF_E178_R	1	rs6477126	9	6896384	0.135081	0.0467921	0.0900354	0.0318405	0.0520501	0.0378231	0.0830305	-0.04201	0.005836	0.3679	-7.198	1.857e-10	1.362e-05	0.0418458
TWIST1_P355_R	7	rs2736619	2	190945317	0.111235	0	0.0452092	0.0150591	0.0302223	0.0130291	0.0810123	0.01949	0.003234	0.2898	6.027	3.714e-08	0.01635	1
PTPRF_E178_R	1	rs10124740	9	6869031	0.0518136	0.0391383	0.0876223	0.0288231	0.132518	0.0471786	0.0807043	-0.04115	0.00575	0.3705	-7.156	2.477e-10	1.558e-05	0.00797696
PTPRF_E178_R	1	rs10815480	9	6902767	0.137423	0.0460759	0.0892527	0.0317145	0.0574334	0.0398659	0.0799896	-0.04078	0.00576	0.3602	-7.079	3.221e-10	1.773e-05	0.00907776
TEK_P479_R	9	rs7038314	9	26883662	0.861182	0.0301945	0.907025	0.0336622	0.940778	0	0.0795965	0.04501	0.006461	0.3529	6.967	5.385e-10	4.741e-05	0.121344
TFDP1_P543_R	13	rs11609862	12	118373917	0.931172	0.0138558	0.916923	0.010685	0.851632	0	0.0795406	-0.01941	0.003359	0.2728	-5.778	1.094e-07	0.04818	1
TEK_P479_R	9	rs4878149	9	27139669	0.863636	0.0319558	0.895426	0.0342306	0.940365	0.0341945	0.0767293	0.03492	0.005743	0.2935	6.081	2.923e-08	0.001608	1
SFTPA1_P421_F	10	rs13086936	3	52634119	0.925127	0.0310496	0.88143	0.0386518	0.84928	0.0618451	0.075847	-0.04101	0.006994	0.2787	-5.864	7.549e-08	0.01662	1
SFTPA1_P421_F	10	rs13099479	3	52652518	0.84928	0.0618451	0.88143	0.0386518	0.925127	0.0310496	0.075847	-0.04101	0.006994	0.2787	-5.864	7.549e-08	0.01662	1
TDGF1_P428_R	3	rs3881953	1	200794644	0.516871	0.0606449	0.443908	0.0537811	0	0	0.072963	0.07296	0.01234	0.2937	5.911	7.07e-08	0.01037	1
TEK_P479_R	9	rs669441	9	27127242	0.860401	0.0317679	0.889569	0.0332804	0.932417	0.0287424	0.0720152	0.03328	0.005198	0.3179	6.404	7.207e-09	0.0004532	1
TDGF1_P428_R	3	rs12743401	1	200743271	0.443908	0.0537811	0.51447	0.0591997	0	0	0.0705623	0.07056	0.01198	0.2852	5.892	7.048e-08	0.01037	1
TEK_P479_R	9	rs666812	9	27110369	0.859022	0.0296745	0.895058	0.0328357	0.929266	0.0406132	0.0702447	0.03553	0.005233	0.3412	6.789	1.219e-09	8.94e-05	0.274637
TDGF1_P428_R	3	rs12734338	1	200736346	0.443908	0.0537811	0.513811	0.0586573	0	0	0.0699037	0.0699	0.01185	0.2833	5.898	6.683e-08	0.01037	5.30944
PMP22_P1254_F	17	rs16891235	6	26125521	0.958491	0.0143233	0.942385	0.0128168	0.892287	0.0520018	0.0662045	-0.02141	0.003294	0.3218	-6.498	4.553e-09	0.002004	1.02605
TIAM1_P188_R	21	rs1555422	9	17611965	0.0694729	0.0256088	0.0433046	0.0184039	0.00535529	0.00430727	0.0641177	-0.02846	0.00403	0.3591	-7.062	3.477e-10	0.000153	0.078336
AFF3_P122_F	2	rs2009094	2	100131509	0.120164	0.0410234	0.0871513	0.0311956	0.0567848	0.0233936	0.063379	0.03139	0.004346	0.3695	7.222	1.658e-10	7.299e-05	0.0373709
TDG_E129_F	12	rs748548	12	124387008	0.824932	0.0402996	0.864326	0.0274301	0.885298	0.0292763	0.0603652	0.03122	0.004943	0.3095	6.317	1.028e-08	0.002263	1
AFF3_P122_F	2	rs2118280	2	100112827	0.115688	0.0401771	0.0870045	0.0314724	0.056285	0.0236921	0.0594029	0.02989	0.004281	0.3539	6.982	5.037e-10	0.0001109	0.11351
H19_P1411_R	11	rs751539	13	50531727	0.794911	0.0531044	0.830076	0.0200471	0.854142	0.0195499	0.0592304	-0.02575	0.004272	0.2899	-6.028	3.692e-08	0.01625	1
JAK3_P1075_R	19	rs10734418	11	33348230	0.797839	0.0440785	0.833672	0.0322219	0.856493	0.0307147	0.0586537	0.02992	0.004952	0.2908	6.041	3.486e-08	0.01535	1
AGTR1_P154_F	3	rs535495	7	9710329	0.0932778	0.0323242	0.0653312	0.0181519	0.0370026	0.0273894	0.0562752	0.02824	0.004866	0.2745	5.803	9.835e-08	0.0433	1
EYA4_P794_F	6	rs4697426	4	23473907	0.128563	0.0302503	0.0975408	0.0312261	0.0728367	0.0274292	0.0557267	0.02676	0.004608	0.2748	5.807	9.682e-08	0.04262	1
SGCE_P250_R	7	rs6799932	3	5995600	0.93772	0.0140611	0.920322	0.0220956	0.884772	0.0196385	0.0529481	-0.02059	0.003555	0.2736	-5.79	1.042e-07	0.04589	1
PRSS1_P1249_R	7	rs6485532	11	44462774	0.887809	0.0327997	0.864691	0.0273494	0.837366	0.0317697	0.0504426	0.02526	0.004175	0.2914	6.05	3.352e-08	0.01476	1
GRPR_P200_R	X	rs3881953	1/Y	200794644	0.863467	0.0242814	0.911207	0.0189466	0	0	0.0477404	-0.04774	0.004662	0.5552	-10.24	1.927e-16	3.414e-11	4.34381e-08
GRPR_P200_R	X	rs12734338	1/Y	200736346	0.911207	0.0189466	0.864222	0.0247492	0	0	0.0469853	-0.04699	0.004623	0.5399	-10.16	1.667e-16	3.414e-11	1.74797e-08
GRPR_P200_R	X	rs12743401	1/Y	200743271	0.911207	0.0189466	0.864306	0.0246702	0	0	0.0469018	-0.0469	0.004636	0.5406	-10.12	2.327e-16	3.414e-11	1.74797e-08
CHI3L2_P226_F	1	rs350171	1	4444653	0.858498	0	0.863026	0.0219574	0.818503	0.0290651	0.0399957	0.03956	0.00669	0.2821	5.914	6.084e-08	0.02678	1
CHI3L2_E10_F	1	rs1338624	1	203648563	0.92165	0.0189922	0.906195	0.0190058	0.885755	0.0255135	0.0358951	-0.01731	0.002913	0.2841	-5.943	5.353e-08	0.02356	1
WT1_P853_F	11	rs2309322	4	181477128	0.0383984	0.022347	0.0758763	0.0274371	0.0510453	0	0.0126469	0.03198	0.005477	0.277	5.839	8.431e-08	0.03712	1
